# Supplementary material for: Introduction of seven nitro groups on the 2-azaadamantane scaffold via a two-shell arrangement strategy
Source: Royal Society of Chemistry journal article supplement (doi:10.1039/d3qo00384a), 2023-01-01
Supplement: d3qo00384a1.pdf [file d3qo00384a1.pdf]

## Supporting Information

### **Title: Introduction of seven nitro groups on 2-azaadamantane scaffold via a two-shell arrangement strategy**

*Author(s):* Qi Zhou,<sup>a</sup> Rongbin Cai,<sup>a</sup> Huan Li,<sup>a</sup> Yunzhi Liu,<sup>a</sup> Bing Li,<sup>a</sup> Tianjiao Hou,<sup>b</sup>

Long Zhu,<sup>a</sup> Guixiang Wang,<sup>a</sup> Yu Zhang,<sup>a,\*</sup> and Jun Luo <sup>a,\*</sup>

<sup>a</sup> School of Chemistry and Chemical Engineering, Nanjing University of Science and Technology, Nanjing 210094, China.

<sup>b</sup> College of Chemical Engineering, Nanjing Tech University, Nanjing 211816, China.

### Table of Contents

|                                                                                   |    |
|-----------------------------------------------------------------------------------|----|
| 1 General Information .....                                                       | 1  |
| 2 Experimental Procedures and Spectroscopic Data of the Synthesized Compounds ... | 1  |
| 3 <sup>1</sup> H-NMR and <sup>13</sup> C-NMR Spectra of Compounds.....            | 9  |
| 4 X-Ray Crystal Structures and Data of Compound <b>10</b> .....                   | 24 |
| 5 X-Ray Crystal Structures and Data of Compound <b>1</b> .....                    | 33 |
| 6 Computational Method.....                                                       | 39 |
| 7 References .....                                                                | 40 |

# 1 General Information

Unless otherwise specified, the chemicals (AR grade) were obtained from commercial sources and were used without further purification.  $N_2O_5$  is a strong oxidizing agent that forms explosive mixtures with organic compounds. The decomposition of  $N_2O_5$  produces highly toxic  $NO_2$  gas.  $N_2O_5$  must be handled in closed systems under a well-ventilated hood. Eye protection and leather gloves must be worn at all times. Petroleum ether refers to the fraction boiling in the 60-90 °C range. The progress of the reactions was monitored by TLC (silica gel, Polygram SILG/UV 254 plates). Column chromatography was performed on aluminium oxide gel (spherical, neutral, 200-300 mesh) or silica gel (200-300 mesh).  $^1H$  and  $^{13}C$  NMR spectra were obtained at 500 and 126 MHz, respectively, and  $CDCl_3$ ,  $DMSO-d_6$ ,  $CD_3OD$ , acetone- $d_6$ , were used as the solvent with TMS as the internal standard. All FTIR spectra were obtained using a Nicolet FTIR IS10 Spectrometer. TGA and DSC were measured with TGA/SDTA851e and DSC823e, respectively at a heating rate of 5 °C·min<sup>-1</sup>. MS/MS (ESI) mass spectra were recorded on a Finnigan TSQ Quantum ultra-AM mass spectrometer (Thermo Fisher Scientific, Waltham, MA USA). X-ray intensity data were collected on a Bruker D8 CMOS detector employing graphite-monochromated Mo-K $\alpha$  radiation ( $\lambda=0.71073$  Å). The known compounds were identified by the comparison of their physical and spectral data with those reported in the literature. Yield refers to the isolated yield of the analytically pure material unless otherwise noted.

4,8-dinitroadamantane-2,6-dione (**S1**)<sup>1</sup>, bicyclo[3.3.1]nonane-2,6-dione (**6**)<sup>2-4</sup> were prepared according to the reported procedures. Bicyclo[3.3.1]nona-3,7-diene-2,6-dione (**5**)<sup>5</sup>, bicyclo[3.3.1]nona-3,7-diene-2,6-diol (**4a**)<sup>6</sup> and 4,8-dimethoxybicyclo[3.3.1]nona-2,6-diene (**4b**)<sup>7</sup> were prepared according to the improved reporting procedure.

## 2 Experimental Procedures and Spectroscopic Data of the Synthesized Compounds

**The attempt to synthesize 2,2,4,6,6,8-hexanitroadamantane (A) :**

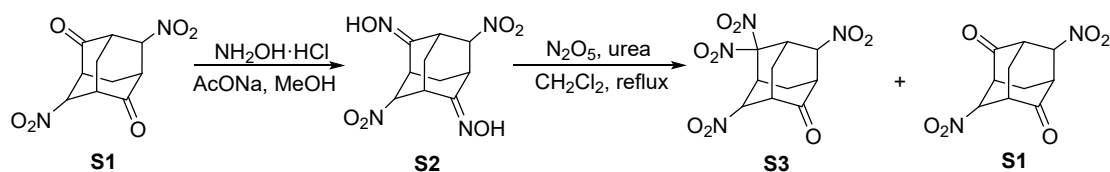

**S1** (0.51g, 2mmol) was dissolved in MeOH (50 mL) and treated with hydroxylamine hydrochloride (0.84 g, 12 mmol) and NaOAc (1.31 g, 16 mmol). The resulting mixture was stirred for 24 h. The reaction mixture was concentrated in vacuo to a volume of approximately 5 mL. Water (15 mL) was added and the mixture was extracted with dichloromethane ( $3 \times 30$  mL). The combined organic phase was washed with saturated solution of  $NaHCO_3$  ( $2 \times 5$  mL) and brine (5 mL), dried with  $Na_2SO_4$ . After removal of the solvent in vacuum, the crude product was mixed with urea (0.72

g, 12 mmol), Na<sub>2</sub>SO<sub>4</sub> (5 g) and CH<sub>2</sub>Cl<sub>2</sub> (20 mL) and heated to 50 °C. A solution of N<sub>2</sub>O<sub>5</sub> (1.3 g, 12 mmol) in CH<sub>2</sub>Cl<sub>2</sub> (8 mL) was added dropwise within 5 min, during this period a green color appeared initially and then faded as more N<sub>2</sub>O<sub>5</sub> was added. The reaction mixture was stirred for additional 1 h and then poured into an iced saturated solution of NaHCO<sub>3</sub> (20 mL). And the mixture was extracted with dichloromethane (3 × 30 mL). The combined organic phase was washed with brine (10 mL), dried with Na<sub>2</sub>SO<sub>4</sub>, and filtered. The solvent was removed in vacuum and the residue was purified by flash silica gel column chromatography (15:1 petroleum/ethyl acetate) to afford the **S3** as a white solid (0.26 g, 40%), then **S1** was recovered as a white solid (0.24 g, 42%).

Compound **S3**: <sup>1</sup>H NMR (500 MHz, Chloroform-*d*) δ 5.05-4.98 (m, 2H), 4.45 (s, 2H), 3.49-3.43 (m, 2H), 2.61 (dt, *J* = 15.7 Hz, 3.3 Hz, 2H), 2.09-2.02 (m, 2H); <sup>13</sup>C NMR (126 MHz, Chloroform-*d*) δ 199.26, 119.06, 85.37, 44.20, 44.20, 33.89, 27.22; IR (thin film, ν cm<sup>-1</sup>): 2947, 2886, 1543, 1460, 1380, 1320, 1087, 916.

Compound **S1**: <sup>1</sup>H NMR (500 MHz, DMSO-*d*<sub>6</sub>) δ 6.75 (s, 1H), 5.67-5.50 (m, 1H), 5.38 (s, 1H), 3.31 (s, 1H), 3.03 (s, 1H), 2.60 (s, 1H) 2.30-2.14 (m, 3H), 1.74 (dt, *J* = 14 Hz, 3.1 Hz, 1H); <sup>13</sup>C NMR (126 MHz, DMSO-*d*<sub>6</sub>) δ 205.51, 202.38, 94.54, 88.97, 88.09, 87.92, 47.73, 47.09, 46.38, 46.17, 45.62, 41.59, 28.28, 27.85, 27.40, 27.20; IR (thin film, ν cm<sup>-1</sup>): 2964, 2896, 1780, 1567, 1391, 1385, 1013.

### Bicyclo[3.3.1]nona-3,7-diene-2,6-dione (**5**):

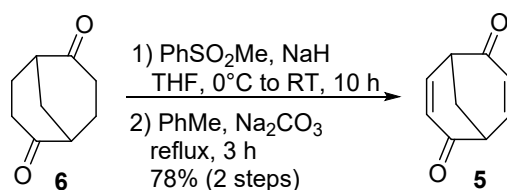

Methyl benzenesulphinate (18.94 mL, 144 mmol) was added in one portion to a suspension of sodium hydride (15.79 g, 395 mmol, 60% dispersion in mineral oil) in dry THF (100 mL) under a nitrogen atmosphere. The resulting suspension was cooled to 0 °C and a solution of dione **6** (10 g, 66 mmol) in dry THF (50 mL) was added dropwise. The reaction mixture was allowed to warm to room temperature and stirred overnight, then quenched with 10% solution of phosphoric acid to pH 3~4. The aqueous phase was extracted with ethyl acetate (3 × 200 mL), the combined organic fractions were washed with brine, dried (Na<sub>2</sub>SO<sub>4</sub>) and evaporated under reduced pressure. The obtained residue was subjected to flash chromatography on silica gel with ethyl acetate to remove unreacted methyl benzenesulfinate. The obtained crude products of phenylsulfinyl derivatives were combined and dissolved in toluene (140 mL). Solid sodium carbonate (14 g, 132 mmol) was added and the resulting suspension was heated under reflux for 2 h. After cooling to room temperature, the reaction mixture was filtered, the filter cake was washed with toluene and the filtrate was evaporated. The obtained residue was purified by column chromatography on silica gel with a petroleum ether-ethyl acetate mixture (2:1) to afford compound **5** (7.6 g, 78%) as an off-white solid. <sup>1</sup>H NMR (500 MHz, Chloroform-*d*) δ 6.99 (dd, *J* = 10.0, 6.8 Hz, 2H), 5.87 (d, *J* = 10.0 Hz, 2H),

3.33 (dt,  $J = 6.2, 2.9$  Hz, 2H), 2.76 (t,  $J = 2.9$  Hz, 2H);  $^{13}\text{C}$  NMR (126 MHz, Chloroform- $d$ )  $\delta$  193.57, 146.44, 126.15, 45.77, 34.44.

#### Bicyclo[3.3.1]nona-3,7-diene-2,6-diol (**4a**):

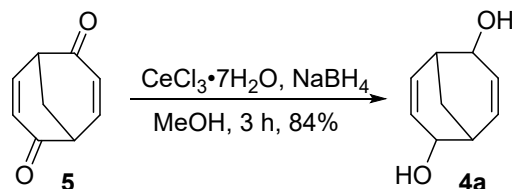

To a solution of **5** (5.4 g, 36 mmol),  $\text{CeCl}_3 \cdot 7\text{H}_2\text{O}$  (27 g, 72 mmol) in  $\text{MeOH}$  (100 mL),  $\text{NaBH}_4$  was added in portions ( $4 \times 0.685$  g, 72 mmol) over a period of two min at ambient temperature. The reaction mixture was stirred for 3 h and then quenched with  $\text{HCl}$  (1 M) to pH 3-4 and concentrated in vacuo to a volume of approximately 5 mL. Brine (35 mL) was added and the mixture was extracted with ethyl acetate ( $5 \times 50$  mL). The combined organic phases were dried over  $\text{Na}_2\text{SO}_4$  and concentrated in vacuo yielding white solid crude material. The product was isolated using flash chromatography affording 4.67 g of **4a** in 84% yield.  $^1\text{H}$  NMR (500 MHz,  $\text{DMSO}-d_6$ )  $\delta$  5.65 (ddd,  $J = 10.2, 5.3, 2.1$  Hz, 2H), 5.50 (dd,  $J = 9.9, 1.6$  Hz, 2H), 4.60 (s, 2H), 4.38 – 4.22 (m, 2H), 2.33 (m, 2H), 1.65 (t,  $J = 3.3$  Hz, 2H);  $^{13}\text{C}$  NMR (126 MHz,  $\text{DMSO}-d_6$ )  $\delta$  132.28, 128.49, 71.32, 35.08, 29.35.

#### 4,8-Dimethoxybicyclo[3.3.1]nona-2,6-diene (**4b**):

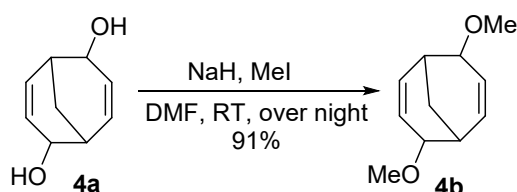

Sodium hydride (4.8 g, 0.12 mol, 60% dispersion in mineral oil) was added to a stirred solution of **4a** (4.56 g, 0.03 mol) in dry  $\text{DMF}$  (30 mL) at  $0^\circ\text{C}$ . The resulting suspension was stirred under a nitrogen atmosphere for 10 min and then  $\text{MeI}$  (7.84 mL 0.12 mol) was added dropwise. The reaction mixture was allowed to warm to room temperature and stirred overnight, then quenched by careful addition of 10%  $\text{HCl}$  solution. The resulting mixture was diluted with water (20 mL) and ethyl acetate (20 mL), layers were separated and the aqueous phase was extracted with ethyl acetate ( $3 \times 30$  mL). Combined organic phase was washed with water (10 mL), saturated solution of  $\text{NaHCO}_3$  ( $2 \times 5$  mL) and brine (10 mL), dried ( $\text{Na}_2\text{SO}_4$ ) and evaporated. The obtained residue was purified by column chromatography on silica gel to afford compound **4b** (4.3 g, 91% yield) as a yellow oil, which was found to be unstable at room temperature.  $^1\text{H}$  NMR (500 MHz, Chloroform- $d$ )  $\delta$  5.80 – 5.74 (m, 2H), 5.71 (d,  $J = 10.3$  Hz, 2H), 4.02 (d,  $J = 5.3$  Hz, 2H), 3.38 (d,  $J = 1.3$  Hz, 6H), 2.71 – 2.63 (m, 2H), 1.78 (s, 2H);  $^{13}\text{C}$  NMR (126 MHz, Chloroform- $d$ )  $\delta$  128.66, 128.40, 80.98, 56.02, 31.69, 28.71.

### 5,10-Dimethoxy-3,8-dioxatetracyclo[4.4.1.0<sup>2,4</sup>.0<sup>7,9</sup>]undecane (**9**):

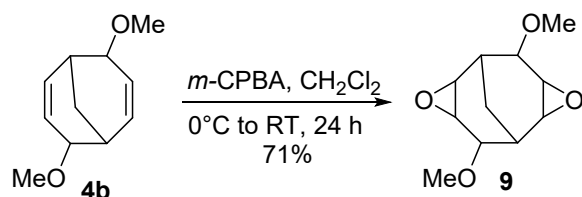

To a suspension of *m*-CPBA (27 g, 133.2 mmol, 85%) in 60 mL of CH<sub>2</sub>Cl<sub>2</sub> at 0 °C was added dropwise a solution of **4b** (4 g, 22.2 mmol) in 60 mL of CH<sub>2</sub>Cl<sub>2</sub>. After being stirred at room temperature for 24 h, the reaction mixture was filtered with diatomite, the filter cake was washed with CH<sub>2</sub>Cl<sub>2</sub>, then quenched by 10% aqueous NaHSO<sub>3</sub> (40 mL), aqueous phase was extracted with CH<sub>2</sub>Cl<sub>2</sub> (3 × 30 mL). Combined organic phase was washed with water (10 mL), saturated solution of NaHCO<sub>3</sub> (10 mL) and brine (10 mL), dried (Na<sub>2</sub>SO<sub>4</sub>) and concentrated in vacuum. The product was purified by flash chromatography (10:1 petroleum/ethyl acetate) to afford compound **9** (3.35 g, 71%) as a white oil, which solidified into a white solid at 0 °C. <sup>1</sup>H NMR (500 MHz, Chloroform-*d*) δ 3.58 (d, *J* = 5.8 Hz, 2H), 3.50 (s, 6H), 3.38 – 3.30 (m, 2H), 3.08 (dd, *J* = 3.8, 1.6 Hz, 2H), 2.48 (dq, *J* = 3.8, 1.8 Hz, 2H), 1.20 (t, *J* = 3.4 Hz, 2H); <sup>13</sup>C NMR (126 MHz, Chloroform-*d*) δ 77.39, 57.13, 53.76, 52.63, 28.99, 15.61; IR (thin film, ν cm<sup>-1</sup>): 2907, 2829, 1432, 1377, 1308, 1256, 1193, 1095, 933, 864, 801, 771, 640; HRMS (ESI): *m/z* calcd for C<sub>11</sub>H<sub>16</sub>O<sub>4</sub>H<sup>+</sup> [M+H]<sup>+</sup> 213.1121, found 213.1448.

### 2-Acetyl-9,10-dimethoxy-2-azaadamantane-4,8-diol (**3b**):

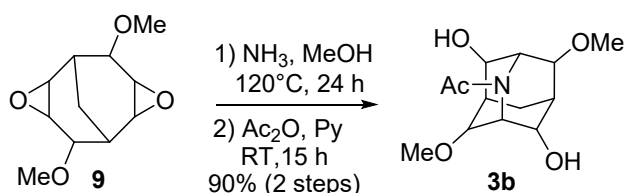

To a solution of **9** (424 mg, 2.0 mmol) in 5 mL of methanol was added 10 mL of ammonia-saturated methanol. The mixture was heated to 120 °C for 24 h in a steel bomb. After cooling, the mixture was concentrated in vacuum. Without further purification, to a mixture of crude products dissolved in pyridine (10 mL) was added dropwise acetic anhydride (0.2 mL, 2.2 mmol) at 0 °C. The reaction mixture was stirred for 12 h at room temperature. The mixture was concentrated in vacuum. The product was purified by flash chromatography (1:1 petroleum/ethyl acetate) to afford acetamide **3b** (412 mg, 90% over 2 steps) as a white solid. <sup>1</sup>H NMR (500 MHz, Methanol-*d*<sub>4</sub>) δ 4.97 – 4.75 (m, 4H), 4.18 (d, *J* = 5.3 Hz, 1H), 4.05 (s, 1H), 3.95 (s, 1H), 3.83 (d, *J* = 5.7 Hz, 2H), 3.35 (dt, *J* = 25.2, 4.2 Hz, 6H), 2.20 (s, 1H), 2.17 – 2.03 (m, 4H), 1.96 (s, 2H); <sup>13</sup>C NMR (126 MHz, Methanol-*d*<sub>4</sub>) δ 171.32, 76.37, 75.82, 65.62, 64.91, 56.26, 55.23, 55.13, 49.27, 36.27, 35.17, 21.57, 20.11; IR (thin film, ν cm<sup>-1</sup>): 2917, 2448, 1613, 1456, 1275, 1107, 1080, 1031, 928, 885, 674; HRMS (ESI): *m/z* calcd for C<sub>13</sub>H<sub>21</sub>NO<sub>5</sub>H<sup>+</sup> [M+H]<sup>+</sup> 272.1492, found 272.1480.

## 2-Nitro-2-azaadamantane-4,8,9,10-tetrayl tetranitrate (**10**):

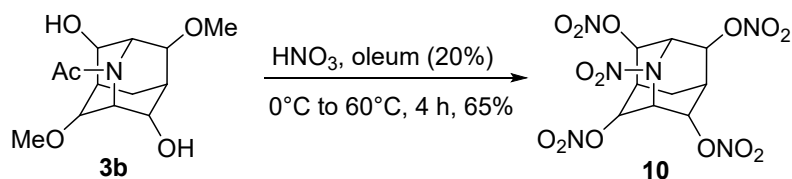

To a mixture of fuming nitric acid (4 mL) and 20% oleum (2 mL) at 0°C was added acetamide **3b** (229 mg, 1.0 mmol). The reaction mixture was heated to 60°C. After stirring for 4 h, the reaction mixture was cooled to ambient temperature and poured into ice-water (20 mL) with agitation. The white particulate was filtered, washed with water and dried in vacuum. The product **10** (272 mg, 65%) was afforded as a white solid. <sup>1</sup>H NMR (500 MHz, Chloroform-*d*) δ 5.79 (d, *J* = 3.4 Hz, 2H), 5.77 (s, 2H), 5.71 (s, 2H), 3.04 (s, 2H), 2.37 (t, *J* = 3.2 Hz, 2H); <sup>13</sup>C NMR (126 MHz, Acetone-*d*<sub>6</sub>) δ 205.39, 77.09, 74.04, 52.76, 31.44, 28.96, 22.65; IR (thin film, ν cm<sup>-1</sup>): 2988, 2901, 1653, 1632, 1543, 1270, 950, 826, 745, 676; HRMS (ESI): *m/z* calcd for C<sub>9</sub>H<sub>10</sub>N<sub>6</sub>O<sub>14</sub>Cl<sup>-</sup> [M+Cl]<sup>-</sup> 460.9949, found 460.9657.

## 2-*tert*-Butoxycarbonyl-9,10-dimethoxy-2-azaadamantane-4,8-diol (**12**):

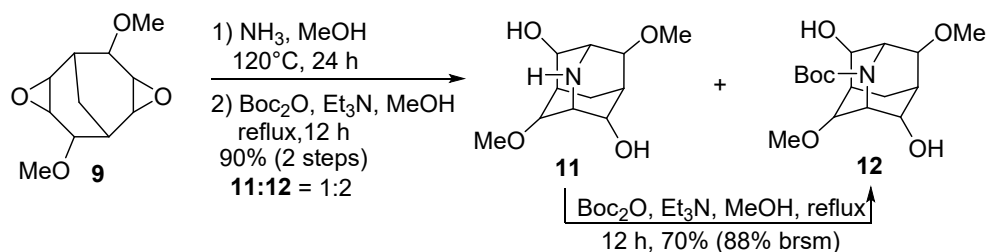

To a solution of **9** (424 mg, 2.0 mmol) in 5 mL of methanol was added 10 mL of ammonia-saturated methanol. The mixture was heated to 120 °C for 24 h in a steel bomb. After cooling, the mixture was concentrated in vacuum to afford the crude product 458 mg. A mixture of crude product (458 mg), triethylamine (2.8 mL, 20 mmol) and MeOH (15 mL) was added di-*tert*-butyl dicarbonate (0.92 mL, 4 mmol) at room temperature. The reaction mixture was refluxed under stirring for 12 h. The mixture was concentrated in vacuum. The product was purified by flash chromatography (10:1 ethyl acetate/methanol) to afford **12** (395 mg, 60% over 2 steps) as a white solid, along with its precursor 9,10-dimethoxy-2-azaadamantane-4,8-diol (**11**, 137 mg, 30% over 2 steps) as a white solid, too. And the compound **11** could continue to react with (Boc)<sub>2</sub>O to furnish **12** (70% yield) combined with recovery of **11** (20% yield).

Compound **11**: <sup>1</sup>H NMR (500 MHz, Methanol-*d*<sub>4</sub>) δ 4.21 (t, *J* = 3.7 Hz, 2H), 3.78 (dd, *J* = 4.1, 2.4 Hz, 2H), 3.30 (s, 6H), 3.20 – 3.14 (m, 2H), 2.13 (t, *J* = 3.6 Hz, 2H), 1.87 (s, 2H); <sup>13</sup>C NMR (126 MHz, Methanol-*d*<sub>4</sub>) δ 77.29, 66.97, 54.85, 52.48, 35.83, 22.10; IR (thin film, ν cm<sup>-1</sup>): 2926, 2818, 1452, 1190, 1081, 1055, 1033, 934, 912, 780, 683; HRMS (ESI): *m/z* calcd for C<sub>11</sub>H<sub>19</sub>NO<sub>4</sub>H<sup>+</sup> [M+H]<sup>+</sup> 230.1387, found 230.1377.

Compound **12**: <sup>1</sup>H NMR (500 MHz, Methanol-*d*<sub>4</sub>) δ 4.26 (d, *J* = 9.0 Hz, 2H), 4.12 (d, *J* = 10.8

Hz, 2H), 3.78 (d,  $J = 3.2$  Hz, 1H), 3.73 (s, 1H), 3.33 (d,  $J = 10.6$  Hz, 6H), 2.11 – 2.03 (m, 2H), 1.91 (s, 2H), 1.46 (s, 9H);  $^{13}\text{C}$  NMR (126 MHz, Methanol- $d_4$ )  $\delta$  155.71, 79.72, 76.43, 76.10, 65.38, 65.14, 55.10, 55.01, 51.90, 50.78, 36.56, 36.25, 27.27, 21.70; IR (thin film,  $\nu$   $\text{cm}^{-1}$ ): 2923, 1660, 1422, 1365, 1289, 1248, 1168, 1096, 1031, 943. HRMS (ESI):  $m/z$  calcd for  $\text{C}_{16}\text{H}_{27}\text{NO}_6\text{K}^+$   $[\text{M}+\text{K}]^+$  368.1470, found 368.1411.

### 2-*tert*-Butoxycarbonyl-9,10-dimethoxy-2-azaadamantane-4,8-dione (**13**):

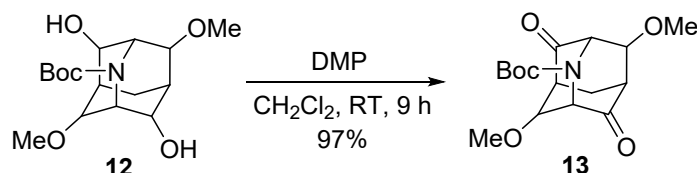

To a solution of the diol **12** (400 mg, 1.2 mmol) in  $\text{CH}_2\text{Cl}_2$  (25 mL) was added Dess-Martin periodinane (3 g, 7 mmol) at room temperature. After stirring for 9 h, the mixture was filtered and the filtrate was concentrated under reduced pressure. Purification of the crude residue via silica gel column chromatography (1:1 petroleum/ethyl acetate) afforded compound **13** (383 mg, 97%) as a white solid.  $^1\text{H}$  NMR (500 MHz, Chloroform- $d$ )  $\delta$  5.04 – 4.99 (m, 1H), 4.82 (dd,  $J = 2.9, 1.5$  Hz, 1H), 3.77 (t,  $J = 3.3$  Hz, 1H), 3.71 (t,  $J = 3.3$  Hz, 1H), 3.38 (d,  $J = 1.4$  Hz, 6H), 2.95 (dd,  $J = 10.2, 3.7$  Hz, 2H), 1.96 – 1.89 (m, 2H), 1.46 (s, 9H);  $^{13}\text{C}$  NMR (126 MHz, Chloroform- $d$ )  $\delta$  203.34, 203.02, 153.46, 83.41, 83.37, 81.57, 60.98, 59.28, 56.73, 56.49, 48.75, 48.64, 28.20, 26.28; IR (thin film,  $\nu$   $\text{cm}^{-1}$ ): 2923, 1726, 1694, 1413, 1320, 1160, 1096, 998, 951, 894, 757; HRMS (ESI):  $m/z$  calcd for  $\text{C}_{16}\text{H}_{23}\text{NO}_6\text{Na}^+$   $[\text{M}+\text{Na}]^+$  348.1418, found 348.1435.

### 2-Acetyl-9,10-dimethoxy-4,4,8,8-tetranitro-2-azaadamantane (**14**):

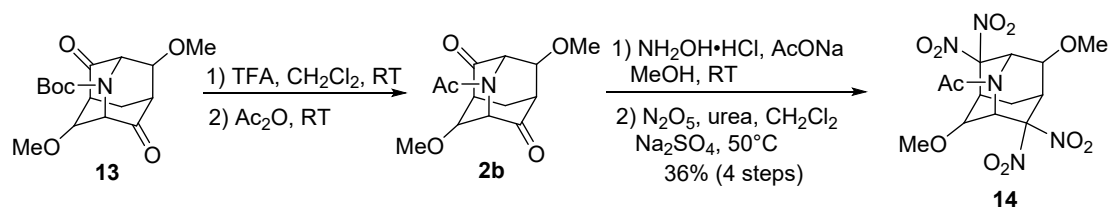

To a solution of  $\text{CH}_2\text{Cl}_2$  (10 mL) and TFA (10 mL) was added **13** (325 mg, 1.0 mmol) at room temperature. After being stirred for 2 h, the mixture was concentrated in vacuum. The crude product was dissolved in  $\text{Ac}_2\text{O}$  (20 mL) and stirred for 12 h, after evaporation of the volatiles in vacuum, the yellow foam obtained was dissolved in MeOH (20 mL) and treated with hydroxylamine hydrochloride (278 mg, 4.0 mmol) and NaOAc (820 mg, 10.0 mmol). The resulting mixture was stirred for 24 h. Brine (20 mL) was added and the mixture was extracted with EtOAc ( $3 \times 30$  mL). The combined organic phase was dried with  $\text{Na}_2\text{SO}_4$ . After removal of the solvent in vacuum, the crude product (350 mg) was mixed with urea (360 mg, 6.0 mmol),  $\text{Na}_2\text{SO}_4$  (5 g) and  $\text{CH}_2\text{Cl}_2$  (20 mL) and heated to 50 °C. A solution of  $\text{N}_2\text{O}_5$  (650 mg, 6.0 mmol) in  $\text{CH}_2\text{Cl}_2$  (5 mL) was added dropwise within 5 min, during this period a green color appeared initially and then faded as more

N<sub>2</sub>O<sub>5</sub> was added. The reaction mixture was stirred for additional 1 h and then poured into an iced saturated solution of NaHCO<sub>3</sub> (30 mL). **And the mixture was extracted with CH<sub>2</sub>Cl<sub>2</sub> (3 × 30 mL). The combined organic phase was washed with brine (10 mL), dried with Na<sub>2</sub>SO<sub>4</sub>, and filtered.** The solvent was removed in vacuum and the residue was purified by flash silica gel column chromatography (3:1 petroleum/ethyl acetate) to afford the product **14** (151 mg, 36%) as a white solid.

Compound **2b**: <sup>1</sup>H NMR (500 MHz, DMSO-*d*<sub>6</sub>) δ 5.18 – 5.10 (m, 1H), 4.63 – 4.54 (m, 1H), 3.96 (t, *J* = 3.3 Hz, 1H), 3.94 (t, *J* = 3.3 Hz, 1H), 3.34 (s, 3H), 3.22 (s, 3H), 2.95 (d, *J* = 3.7 Hz, 1H), 2.86 (d, *J* = 3.8 Hz, 1H), 2.00 (s, 3H), 1.97 (s, 2H); <sup>13</sup>C NMR (126 MHz, DMSO-*d*<sub>6</sub>) δ 203.82, 203.26, 169.08, 83.14, 82.58, 64.11, 58.00, 57.05, 56.43, 48.23, 47.92, 25.19, 21.61; IR (thin film, ν cm<sup>-1</sup>): 2932, 1728, 1625, 1584, 1416, 1277, 1091, 988, 961, 591; HRMS (ESI): *m/z* calcd for C<sub>13</sub>H<sub>17</sub>NO<sub>5</sub>H<sup>+</sup> [M+H]<sup>+</sup> 268.1179, found 268.1185.

Compound **14**: <sup>1</sup>H NMR (500 MHz, Acetone-*d*<sub>6</sub>) δ 6.25 (s, 1H), 5.43 (s, 1H), 3.92 (d, *J* = 2.1 Hz, 2H), 3.86 (dd, *J* = 3.7, 2.1 Hz, 1H), 3.80 (t, *J* = 3.0 Hz, 1H), 3.39 (s, 3H), 3.32 (s, 3H), 2.42 (s, 1H), 2.42 (s, 1H), 2.38 (s, 3H); <sup>13</sup>C NMR (126 MHz, Acetone-*d*<sub>6</sub>) δ 205.41, 169.86, 113.46, 76.71, 76.45, 57.33, 56.77, 54.15, 46.42, 35.27, 34.06, 23.80, 20.72; IR (thin film, ν cm<sup>-1</sup>): 2920, 1672, 1594, 1582, 1562, 1409, 1305, 1277, 1105, 966, 827, 777, 681; HRMS (ESI): *m/z* calcd for C<sub>13</sub>H<sub>17</sub>N<sub>5</sub>O<sub>11</sub>H<sup>+</sup> [M+H]<sup>+</sup> 420.0997, found 420.1049.

### 2,9,9,10,10-pentanitro-2-azaadamantane-4,8-diyl dinitrate (**1**):

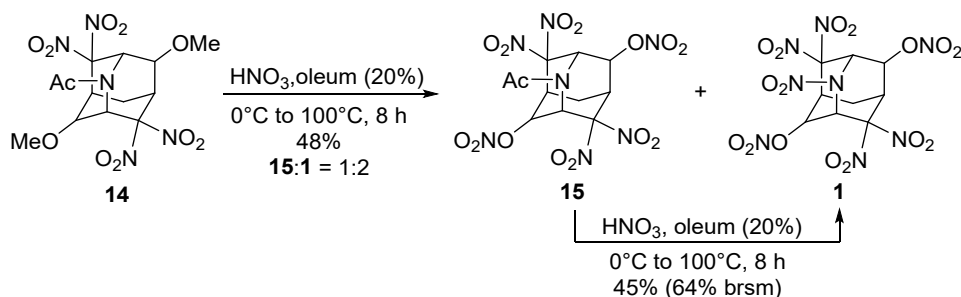

To a mixture of fuming nitric acid (4 mL) and 20% oleum (2 mL) at 0°C was added compound **14** (150 mg, 0.36 mmol). The reaction mixture was heated to 100°C. After stirring for 8 h, the reaction mixture was cooled to ambient temperature and poured into ice-water (25 mL) with agitation. The white participate was filtered, washed with water and dried in vacuum. The product was purified by flash chromatography (6:1 petroleum/ethyl acetate) to afford product **1** (155 mg, 32%) as a white solid along with **15** (77 mg, 16%, 4:1 petroleum/ethyl acetate) as a white solid. Compound **15** could undergo the same nitrolysis procedure to provide **1** (45%) combined with recovery of **15** (30%).

Compound **15**: <sup>1</sup>H NMR (500 MHz, Acetone-*d*<sub>6</sub>) δ 6.46 (s, 1H), 5.98 (s, 1H), 5.81 (t, *J* = 2.9 Hz, 1H), 5.71 (t, *J* = 2.8 Hz, 1H), 4.26 (t, *J* = 3.1 Hz, 1H), 4.20 – 4.14 (m, 1H), 3.00 (dt, *J* = 16.8, 3.2 Hz, 1H), 2.91 (dt, *J* = 16.8, 3.2 Hz, 1H), 2.47 (s, 3H); <sup>13</sup>C NMR (126 MHz, Acetone-*d*<sub>6</sub>) δ 169.92, 113.00, 112.37, 75.70, 75.30, 52.53, 45.97, 34.67, 34.41, 23.80, 20.42; IR (thin film, ν cm<sup>-1</sup>): 1688,



1681, 1662, 1591, 1279, 828, 806, 789, 779, 721; HRMS (ESI):  $m/z$  calcd for  $C_{11}H_{11}N_7O_{15}Na^+$   $[M+Na]^+$  504.0205, found 504.0196.

Compound 1:  $^1H$  NMR (500 MHz, Acetone- $d_6$ )  $\delta$  6.84 (s, 2H), 6.00 – 5.96 (m, 2H), 4.29 (s, 2H), 3.04 (s, 2H);  $^{13}C$  NMR (126 MHz, Acetone- $d_6$ )  $\delta$  111.82, 74.67, 52.73, 34.82, 23.64; IR (thin film,  $\nu$   $cm^{-1}$ ): 3029, 1689, 1587, 1268, 977, 938, 802, 717; HRMS (ESI):  $m/z$  calcd for  $C_9H_8N_8O_{16}Cl^-$   $[M+Cl]^-$  518.9752, found 518.9806.

# 3 <sup>1</sup>H-NMR and <sup>13</sup>C-NMR Spectra of Compounds

<sup>1</sup>H NMR spectrum of compound S3 (CDCl<sub>3</sub>, 500 MHz)

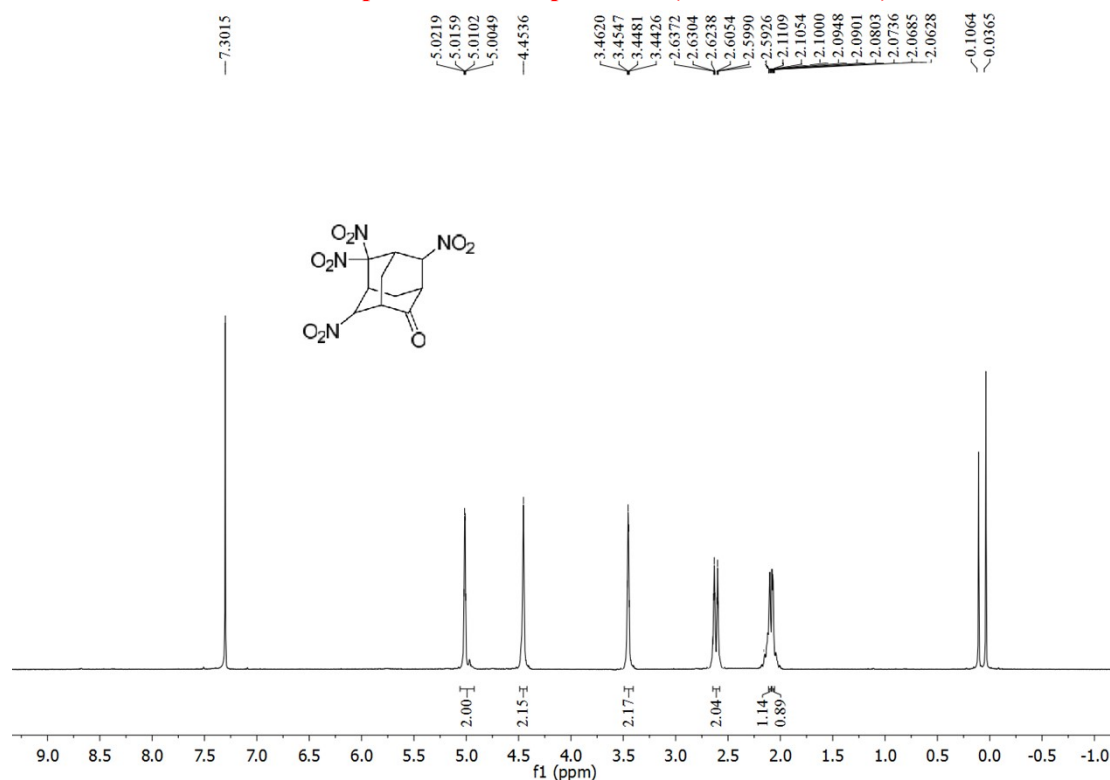

<sup>13</sup>C NMR spectrum of compound S3 (CDCl<sub>3</sub>, 126 MHz)

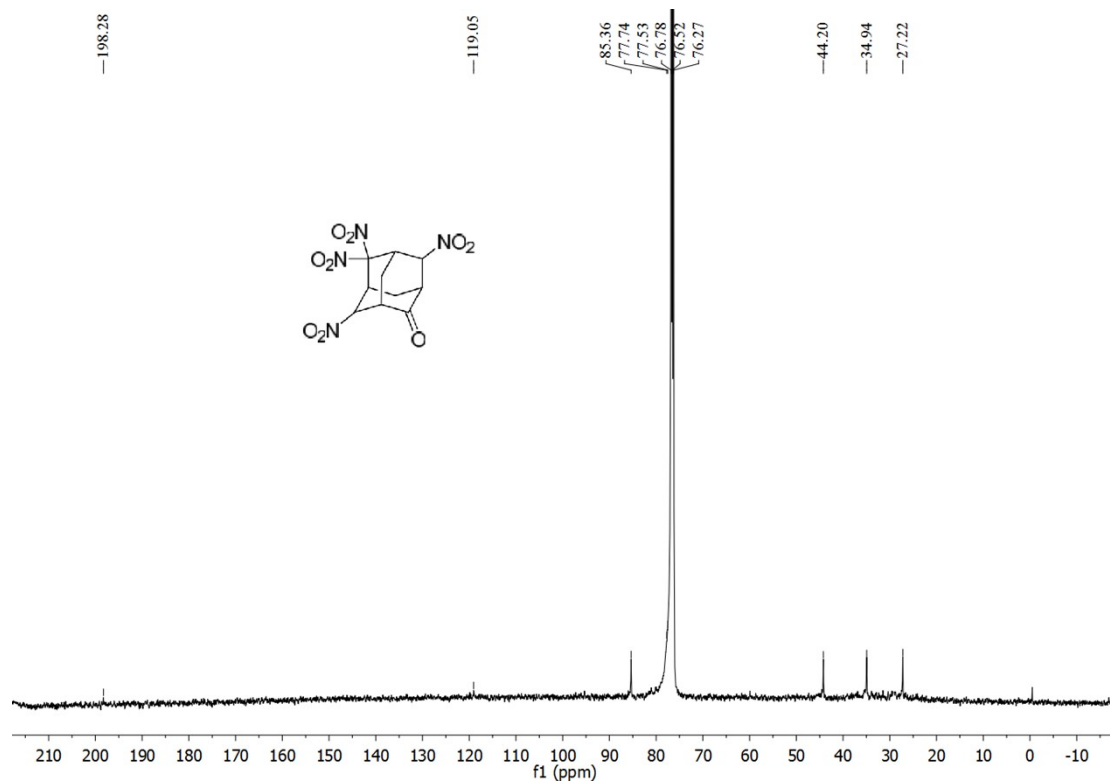

**<sup>1</sup>H NMR spectrum of compound S1 (DMSO-*d*<sub>6</sub>, 500 MHz)**

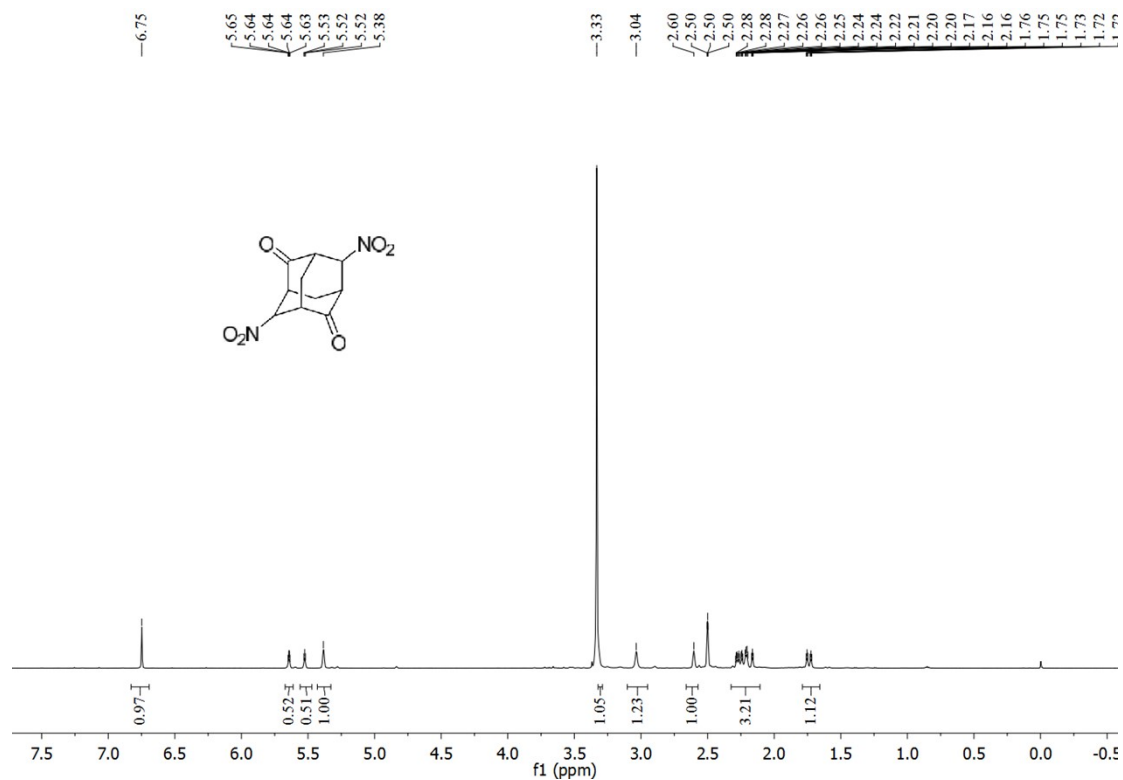

**<sup>13</sup>C NMR spectrum of compound S1 (DMSO-*d*<sub>6</sub>, 126 MHz)**

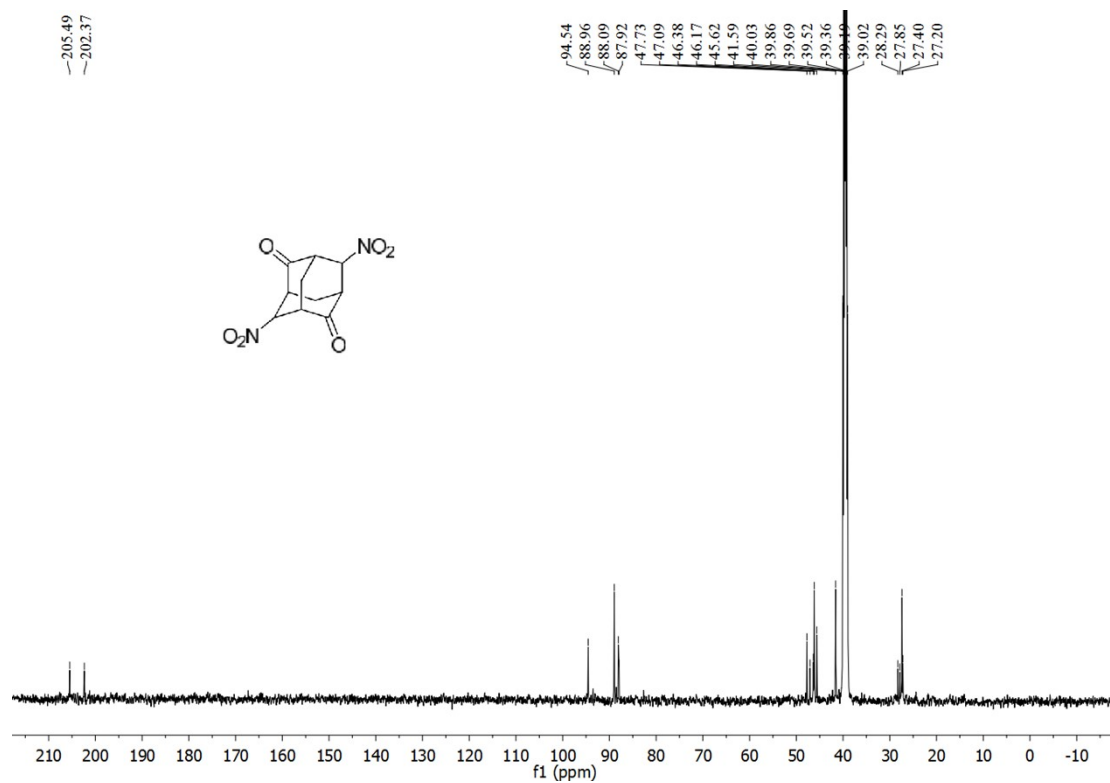

**<sup>1</sup>H NMR spectrum of compound 5 (CDCl<sub>3</sub>, 500 MHz)**

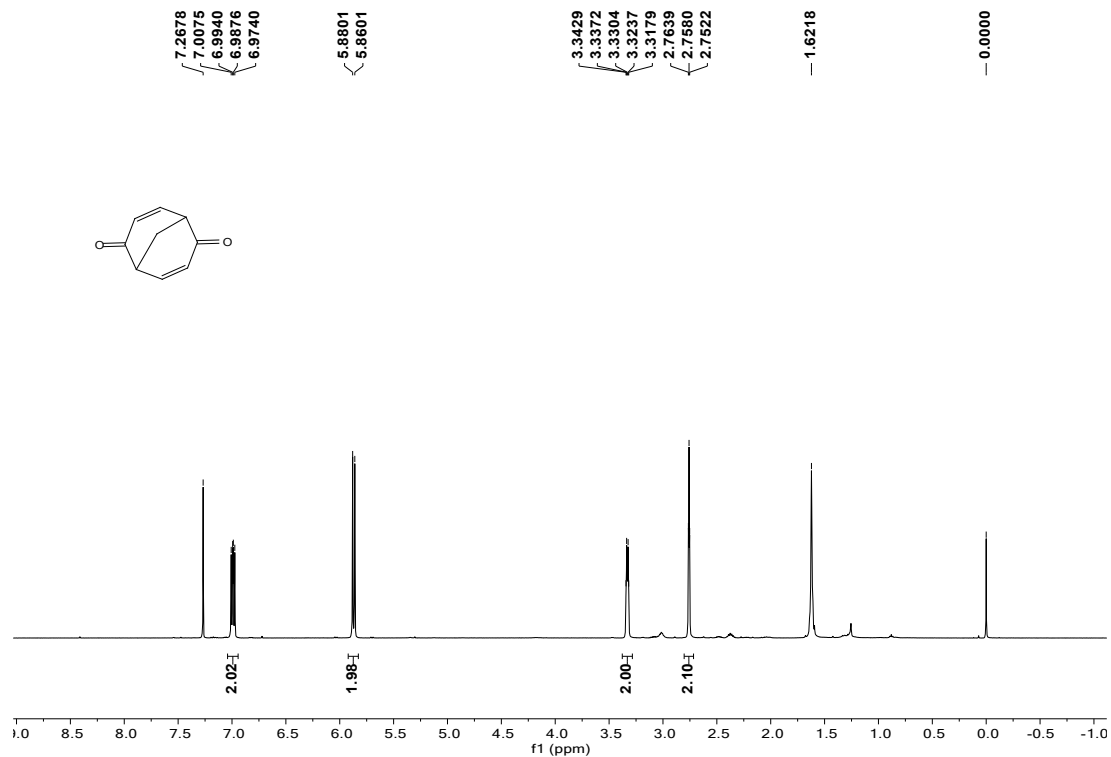

**<sup>13</sup>C NMR spectrum of compound 5 (CDCl<sub>3</sub>, 126 MHz)**

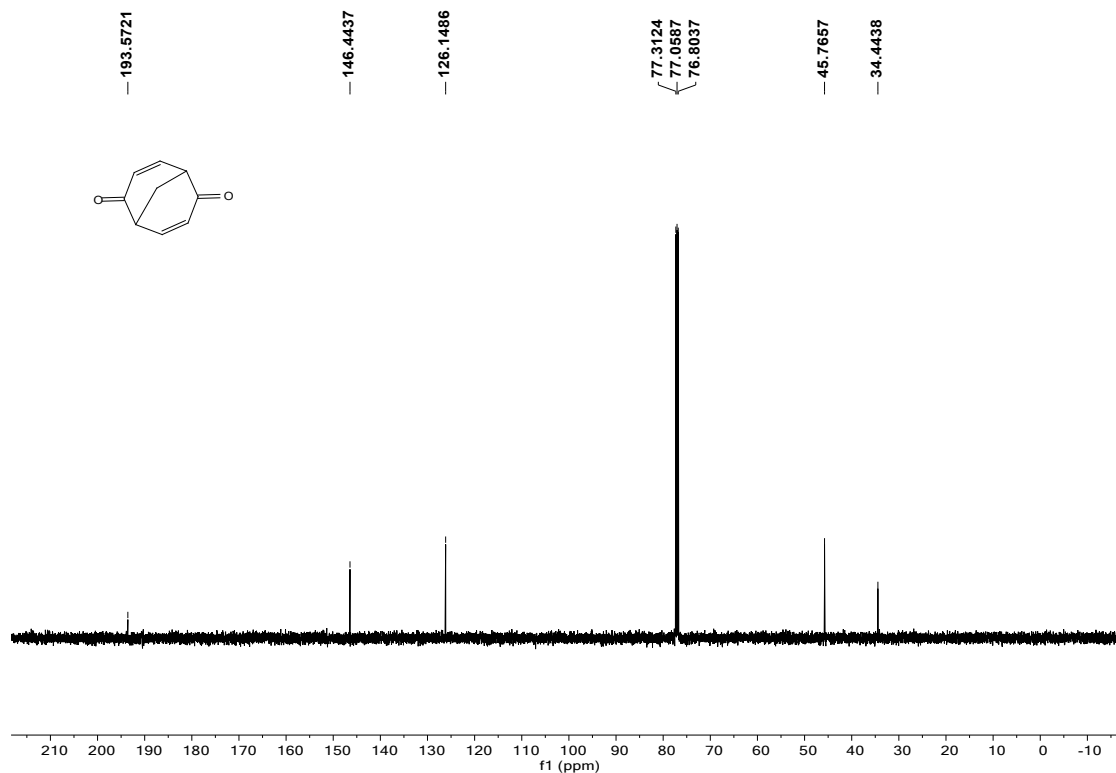

**<sup>1</sup>H NMR spectrum of compound 4a (DMSO-*d*<sub>6</sub>, 500 MHz)**

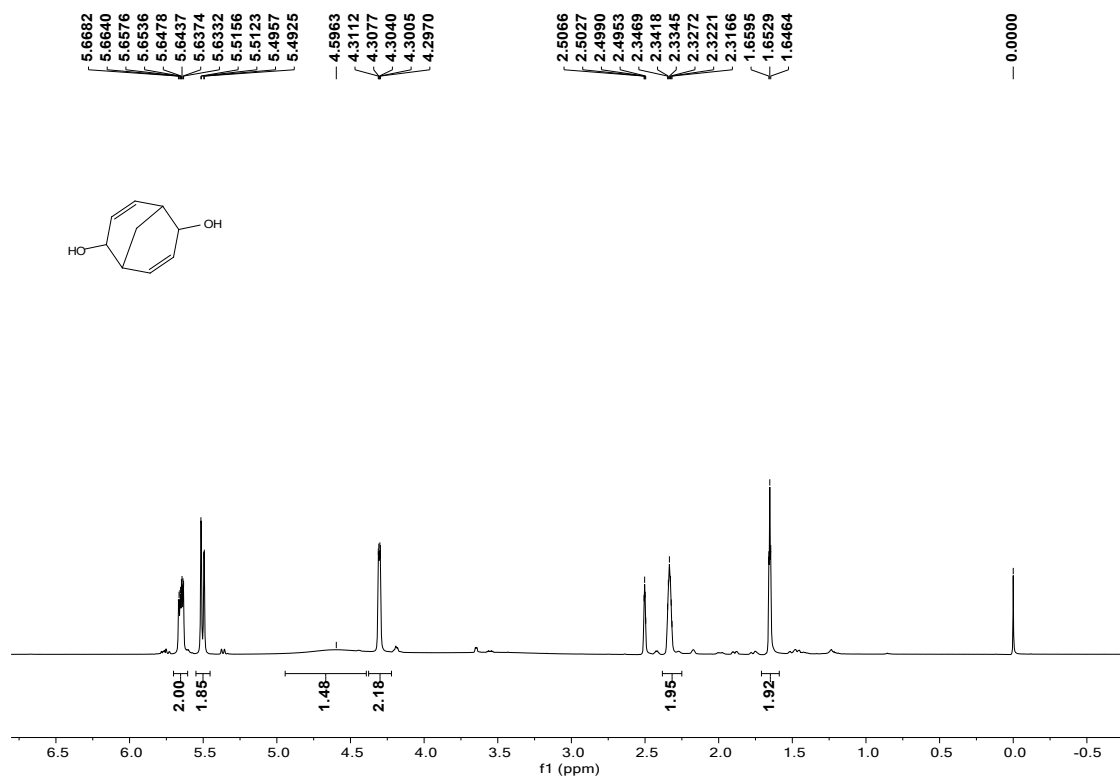

**<sup>13</sup>C NMR spectrum of compound 4a (DMSO-*d*<sub>6</sub>, 126 MHz)**

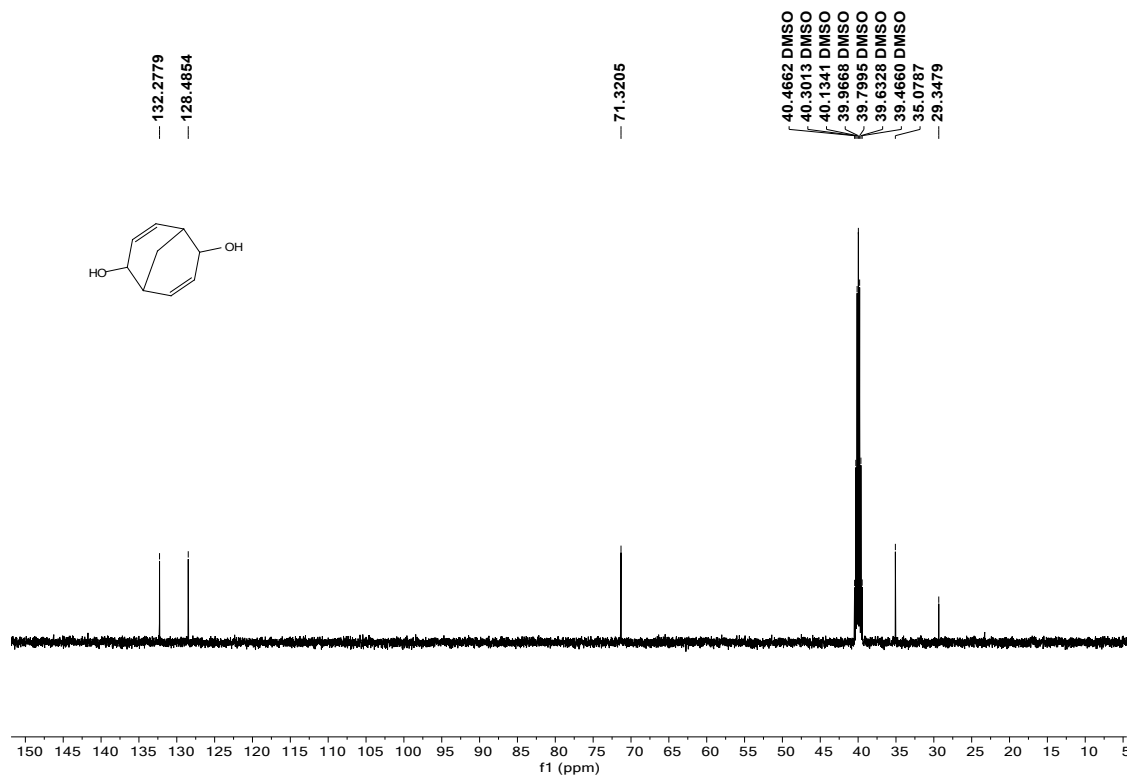

**<sup>1</sup>H NMR spectrum of compound 4b (CDCl<sub>3</sub>, 500 MHz)**

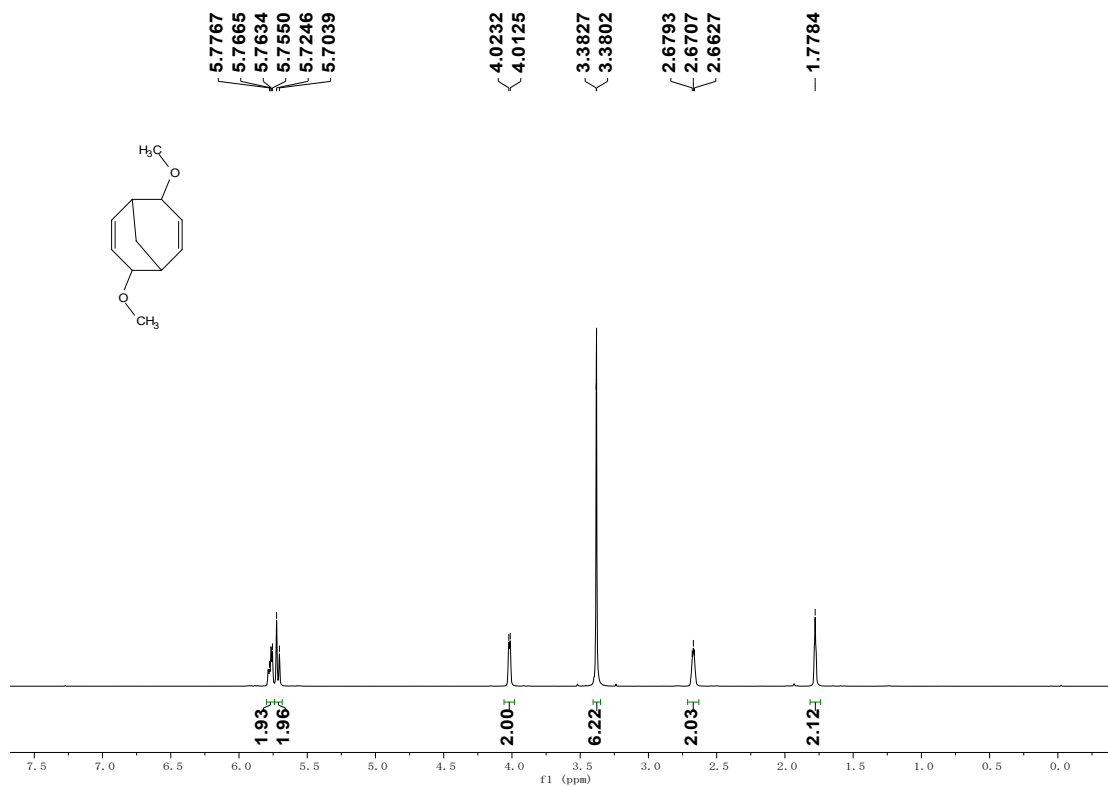

**$^{13}\text{C}$  NMR spectrum of compound 4b ( $\text{CDCl}_3$ , 126 MHz)**

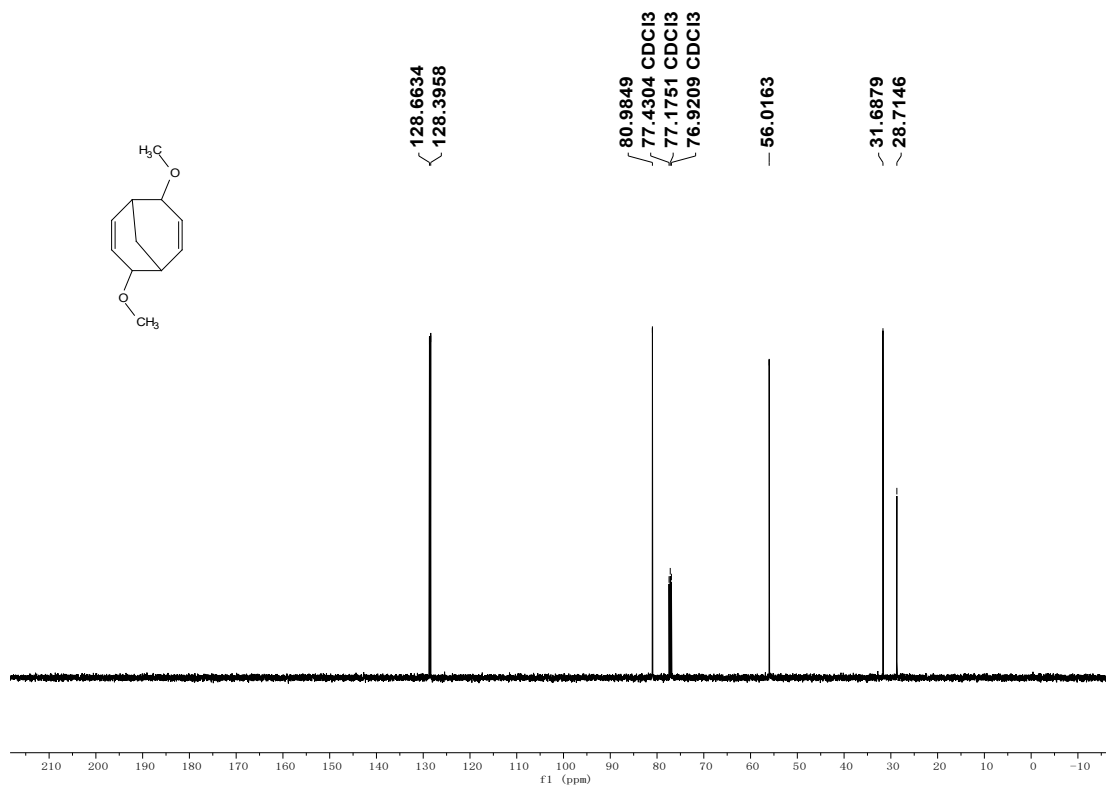

**$^1\text{H}$  NMR spectrum of compound 9 ( $\text{CDCl}_3$ , 500 MHz)**

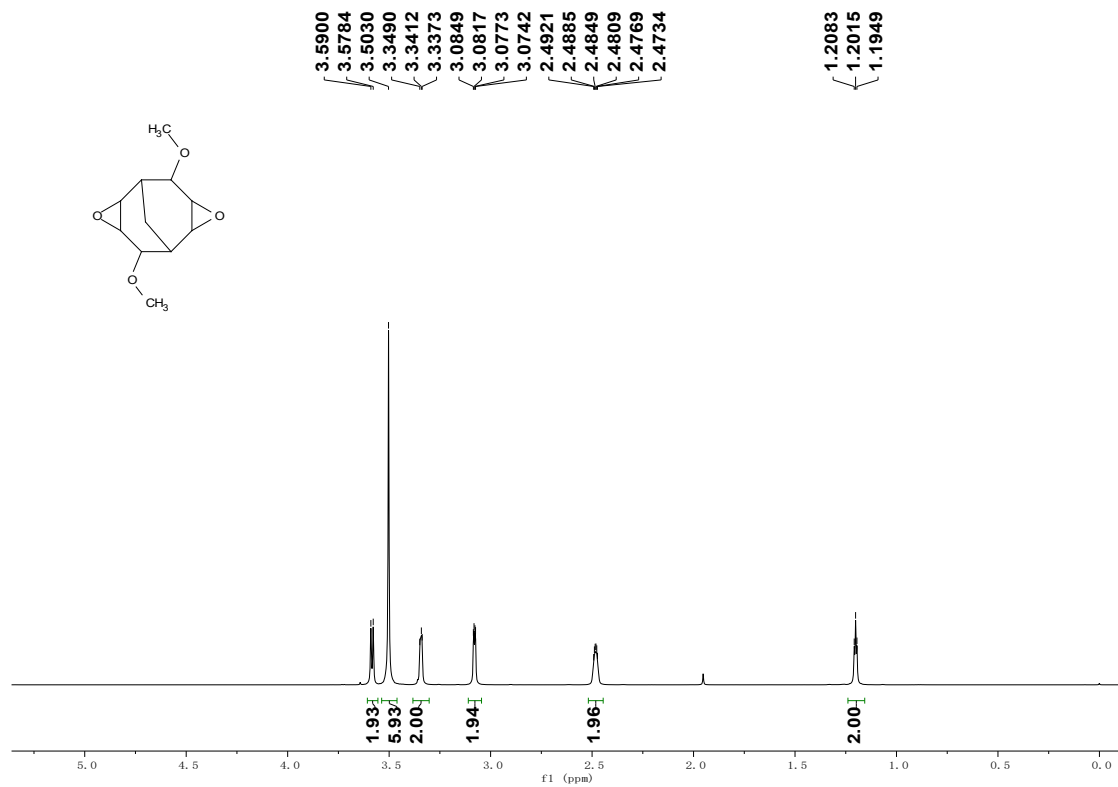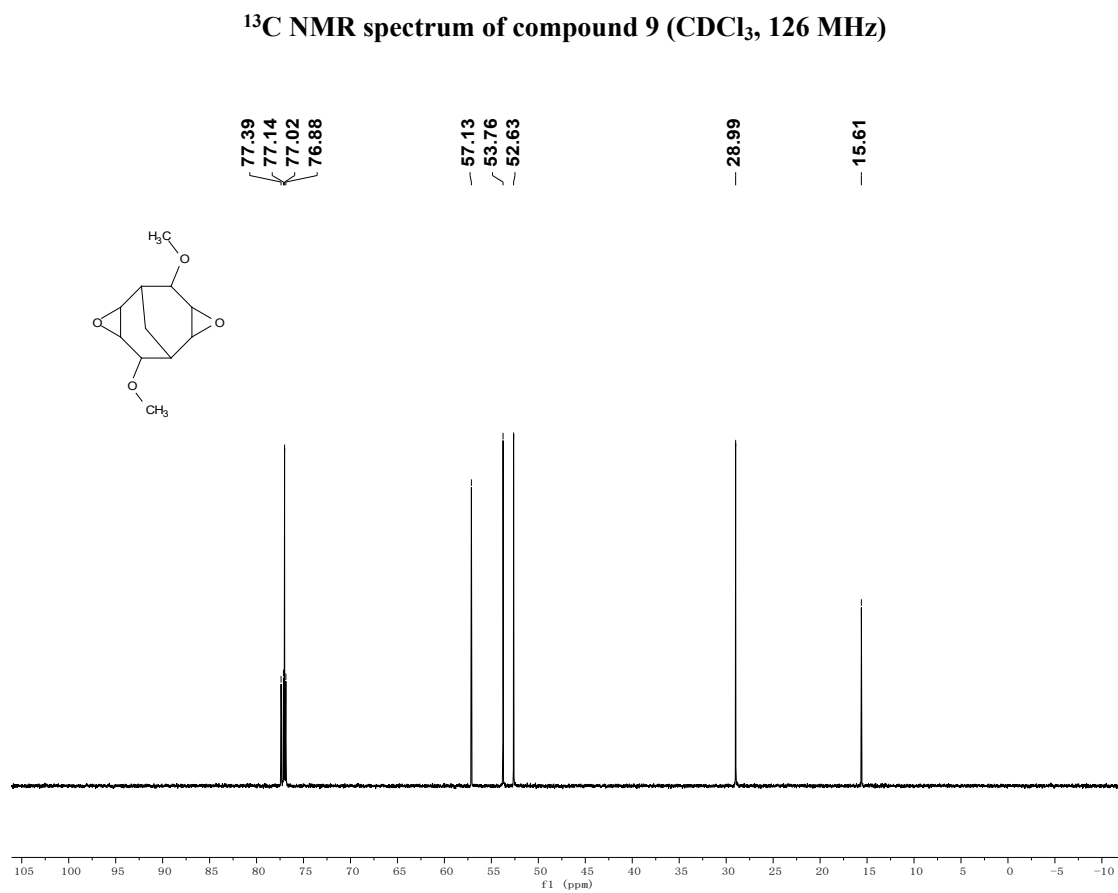

<sup>1</sup>H NMR spectrum of compound 3b (CD<sub>3</sub>OD, 500 MHz)



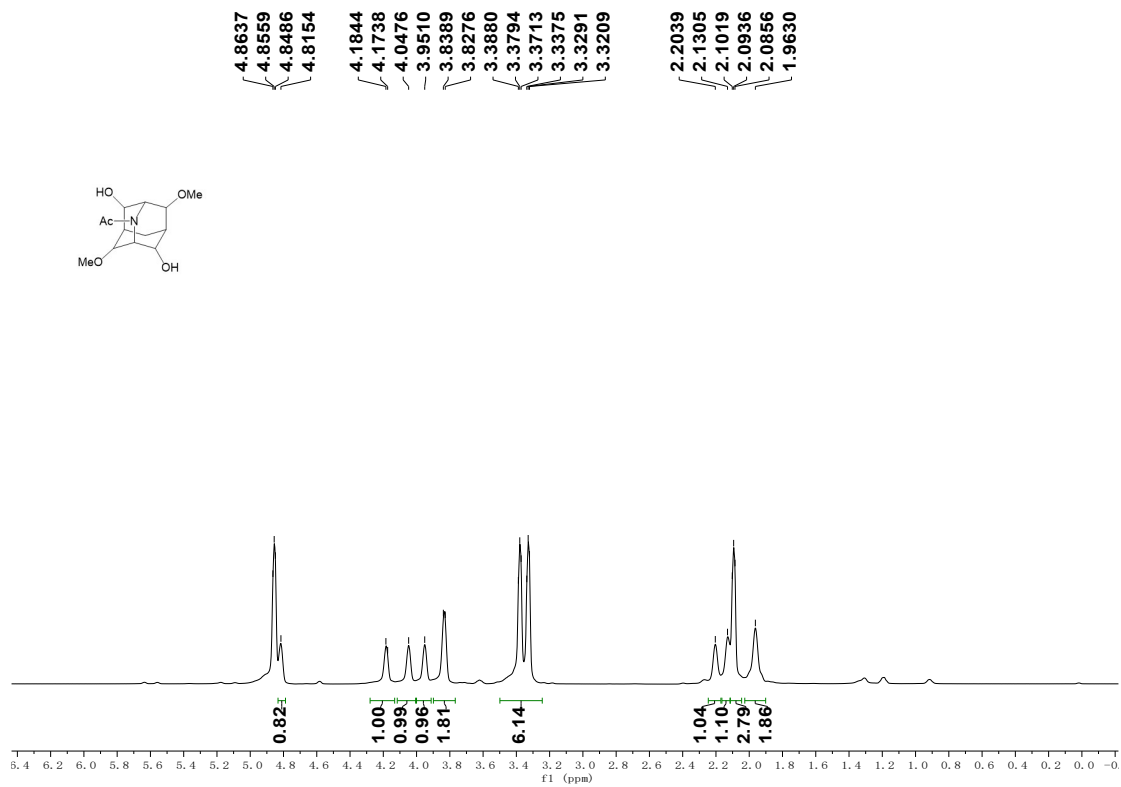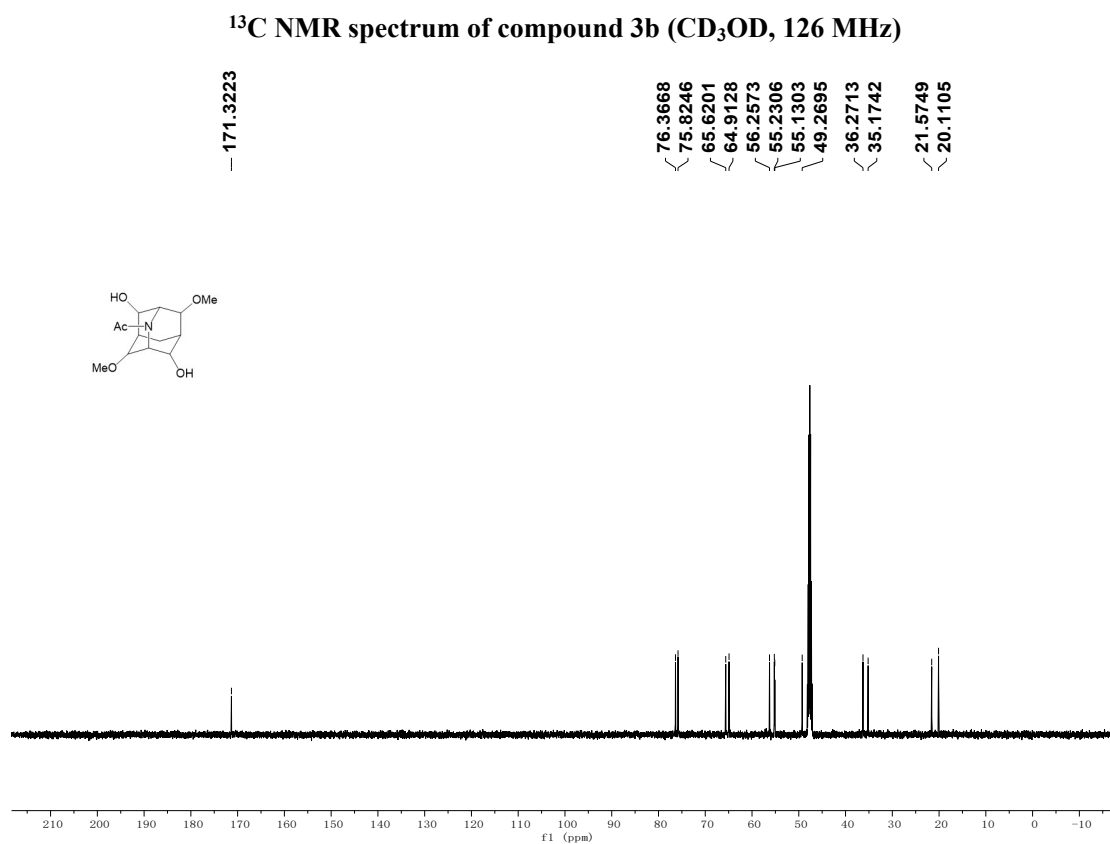

**<sup>1</sup>H NMR spectrum of compound 10 (CDCl<sub>3</sub>, 500 MHz)**

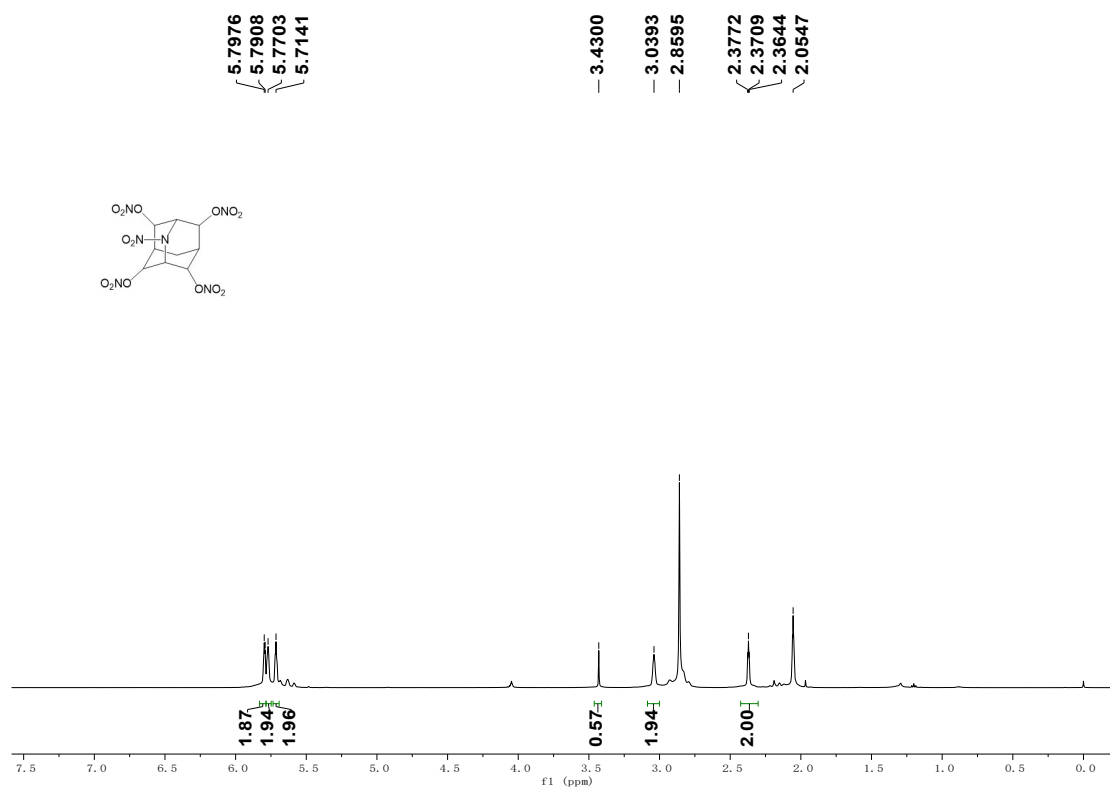

<sup>13</sup>C NMR spectrum of compound 10 (CDCl<sub>3</sub>, 126 MHz)

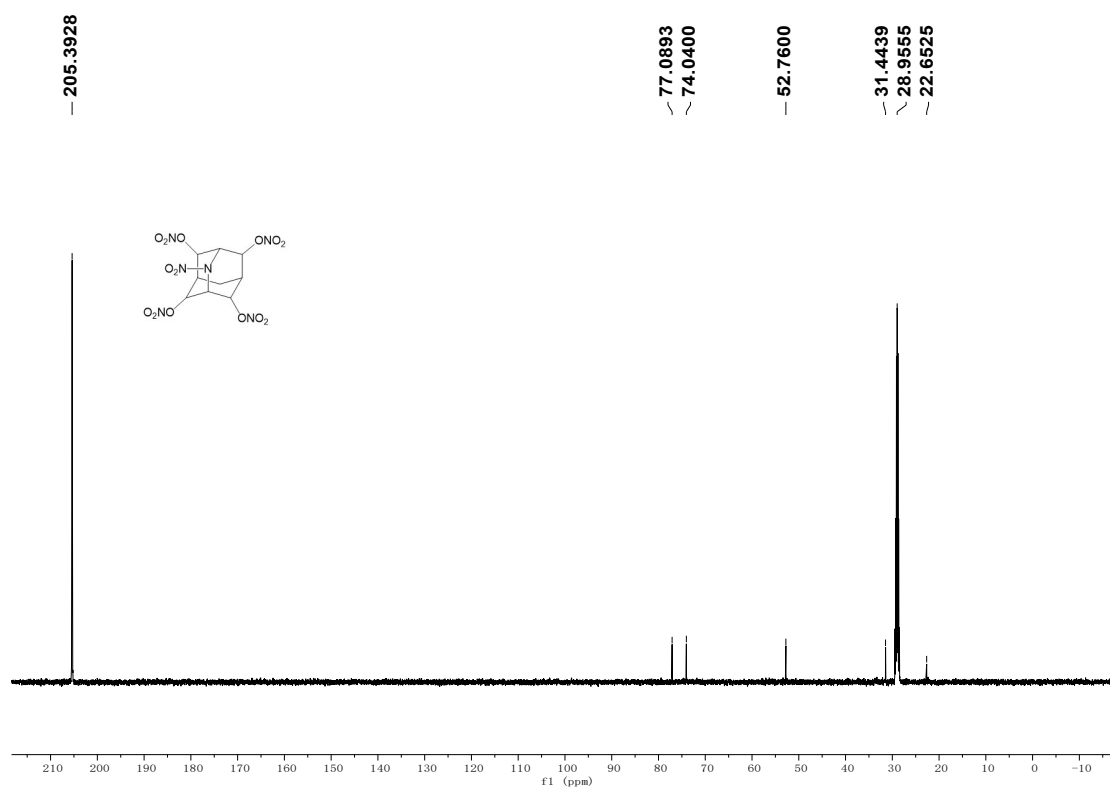

<sup>1</sup>H NMR spectrum of compound 11 (CD<sub>3</sub>OD, 500 MHz)

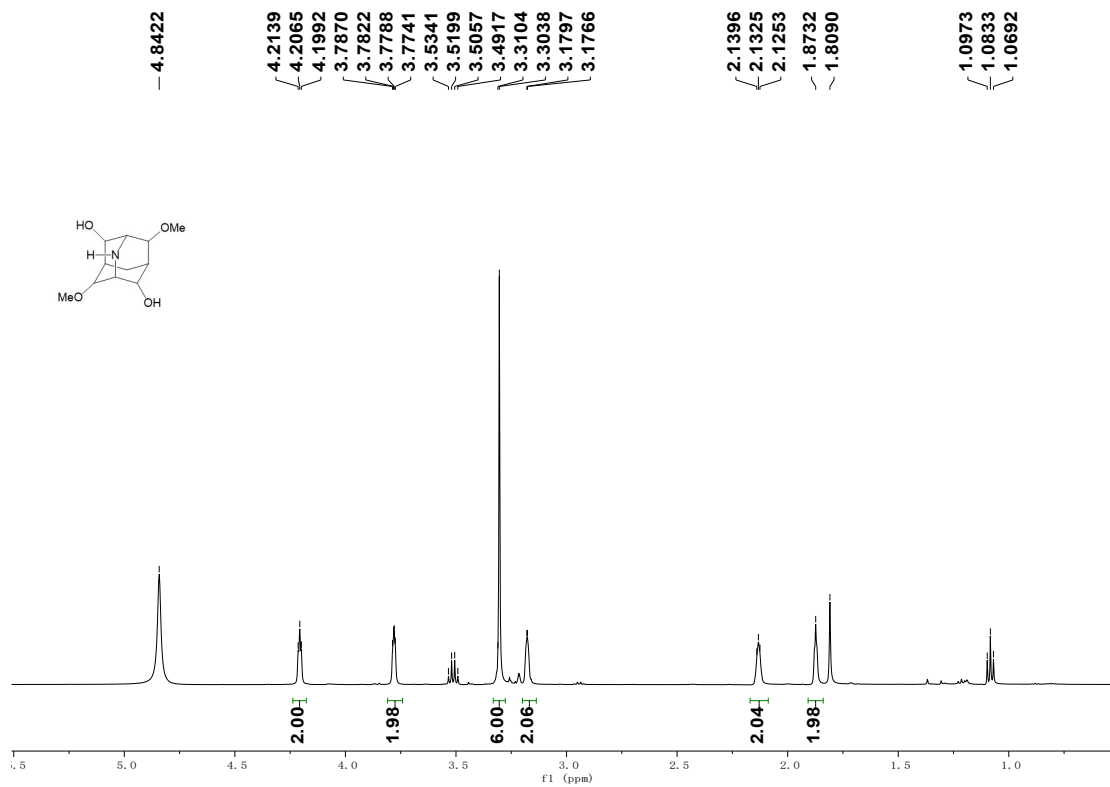

**<sup>13</sup>C NMR spectrum of compound 11 (CD<sub>3</sub>OD, 126 MHz)**

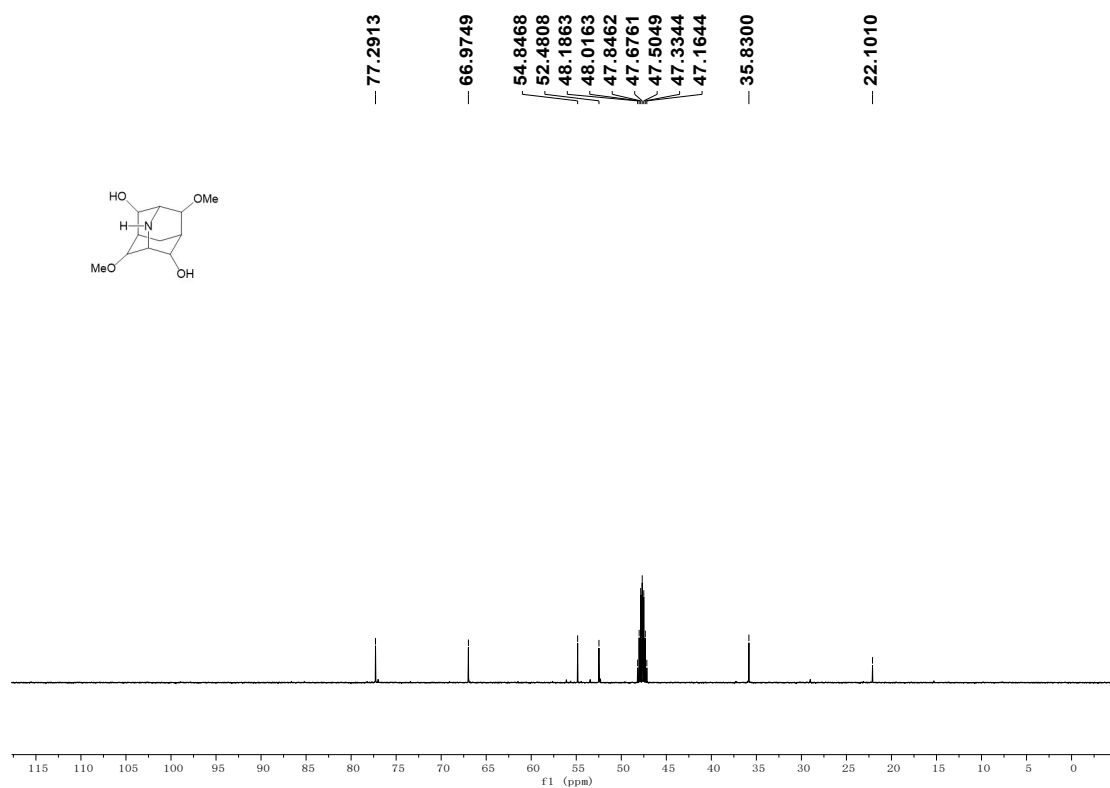

**<sup>1</sup>H NMR spectrum of compound 12 (CD<sub>3</sub>OD, 500 MHz)**

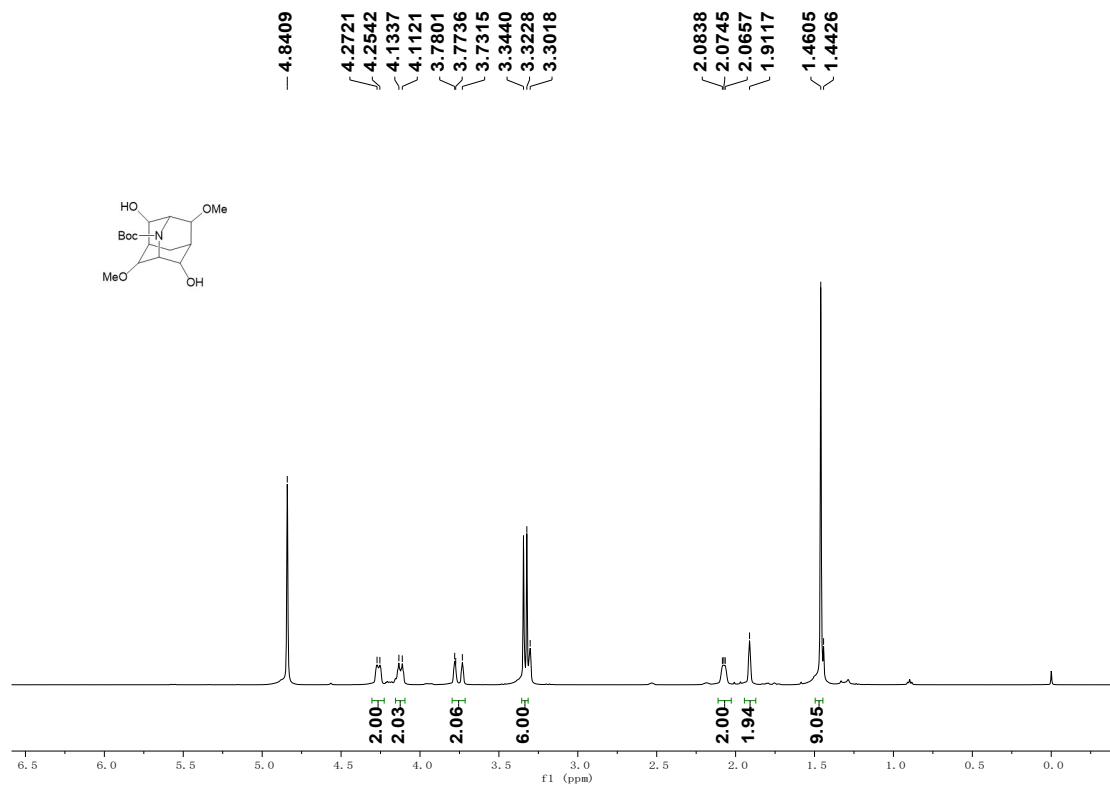

**<sup>13</sup>C NMR spectrum of compound 12 (CD<sub>3</sub>OD, 126 MHz)**

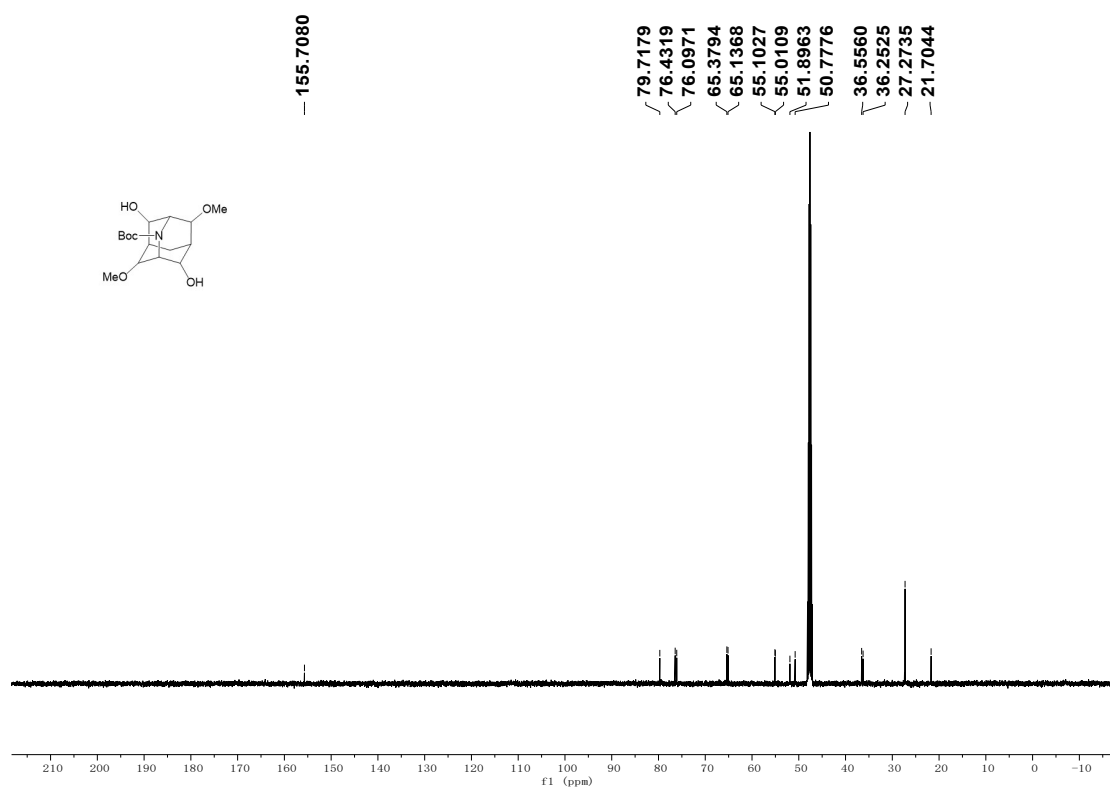

**<sup>1</sup>H NMR spectrum of compound 13 (CDCl<sub>3</sub>, 500 MHz)**

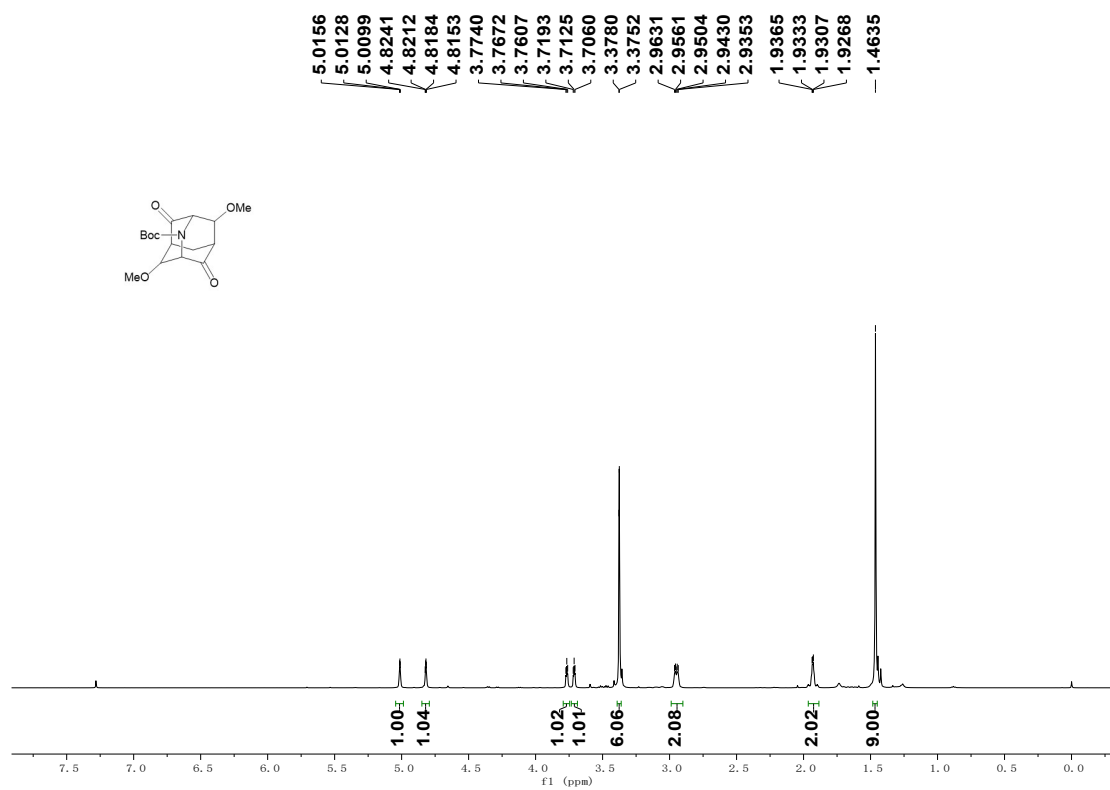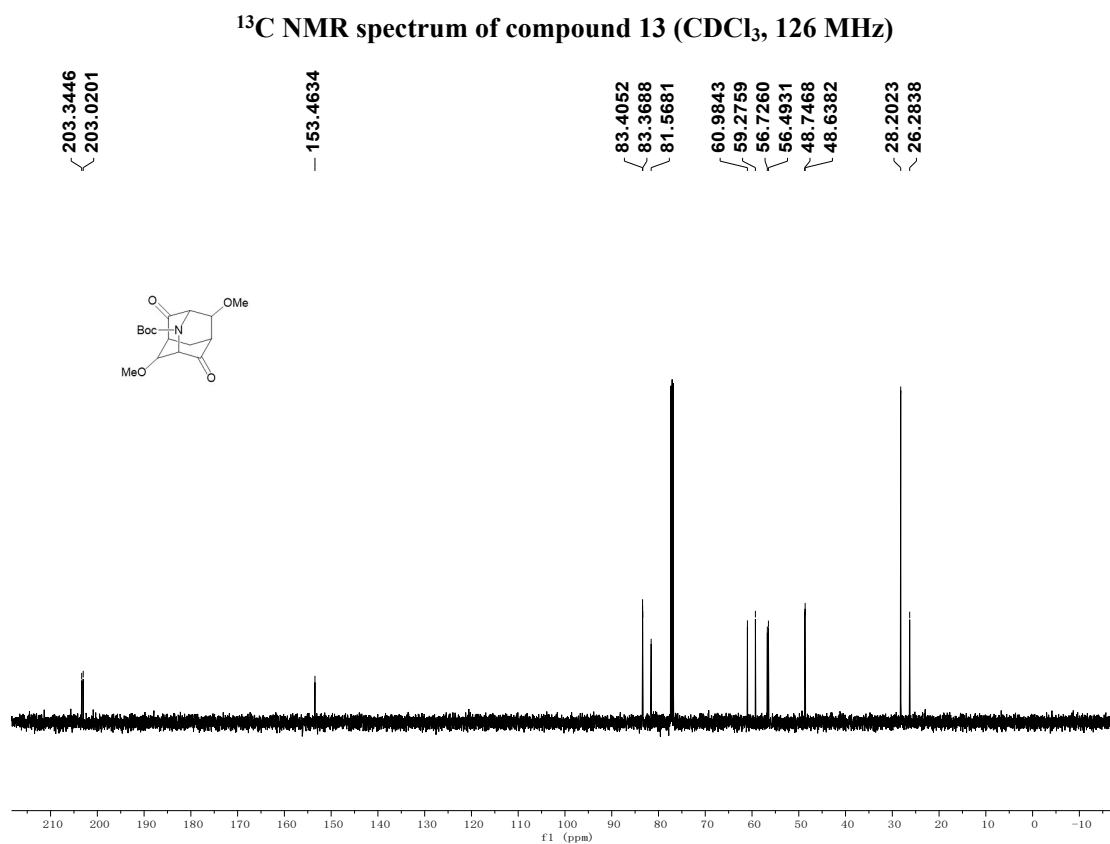

<sup>1</sup>H NMR spectrum of compound 2b (DMSO-*d*<sub>6</sub>, 500 MHz)

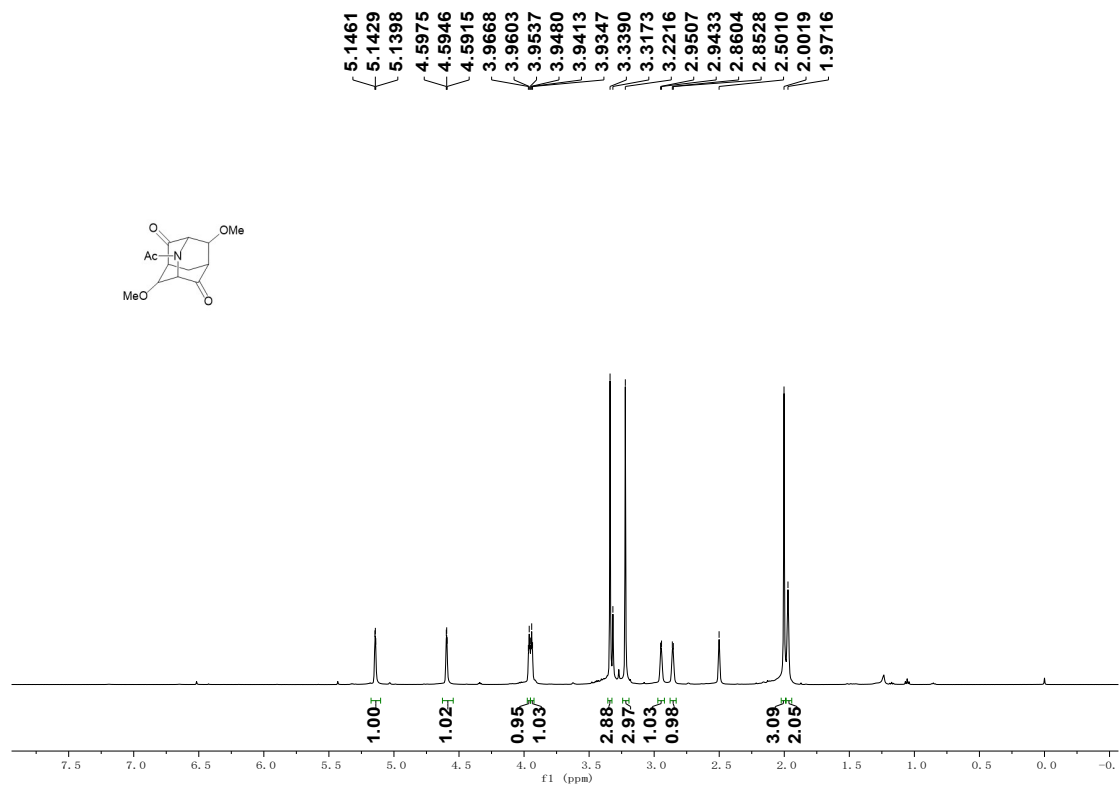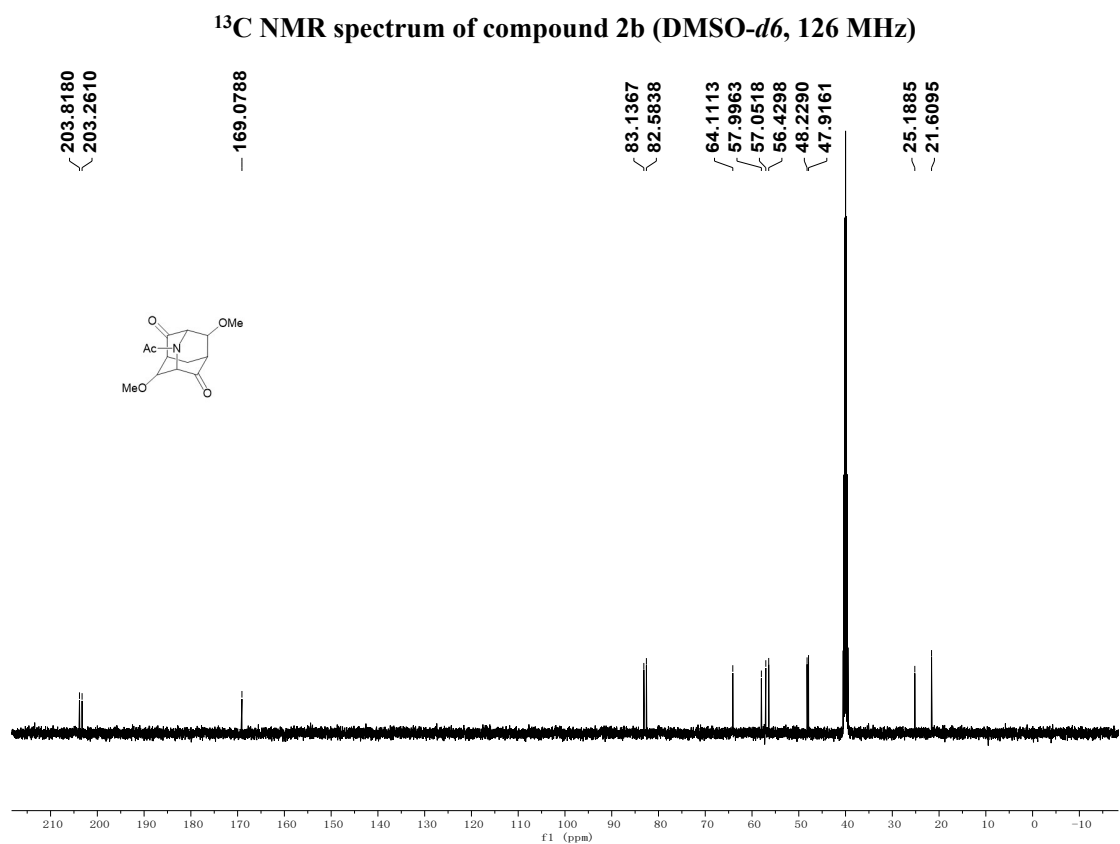

**<sup>1</sup>H NMR spectrum of compound 14 (C<sub>3</sub>D<sub>6</sub>O, 500 MHz)**

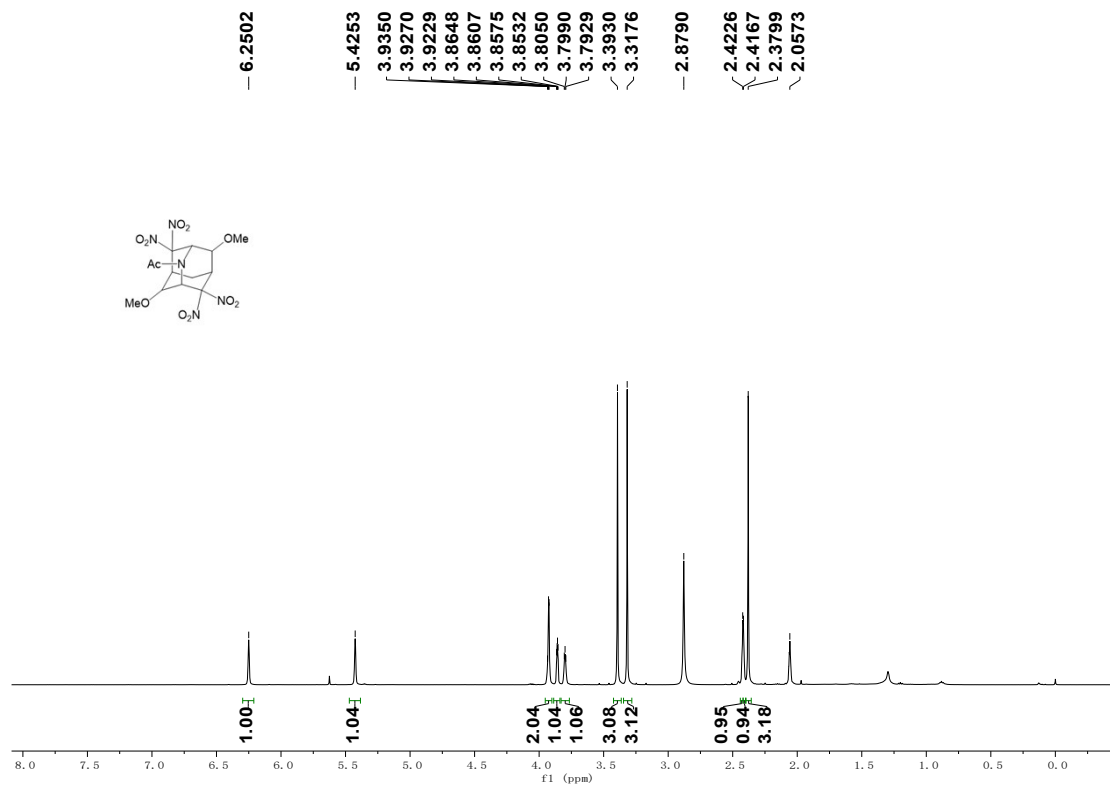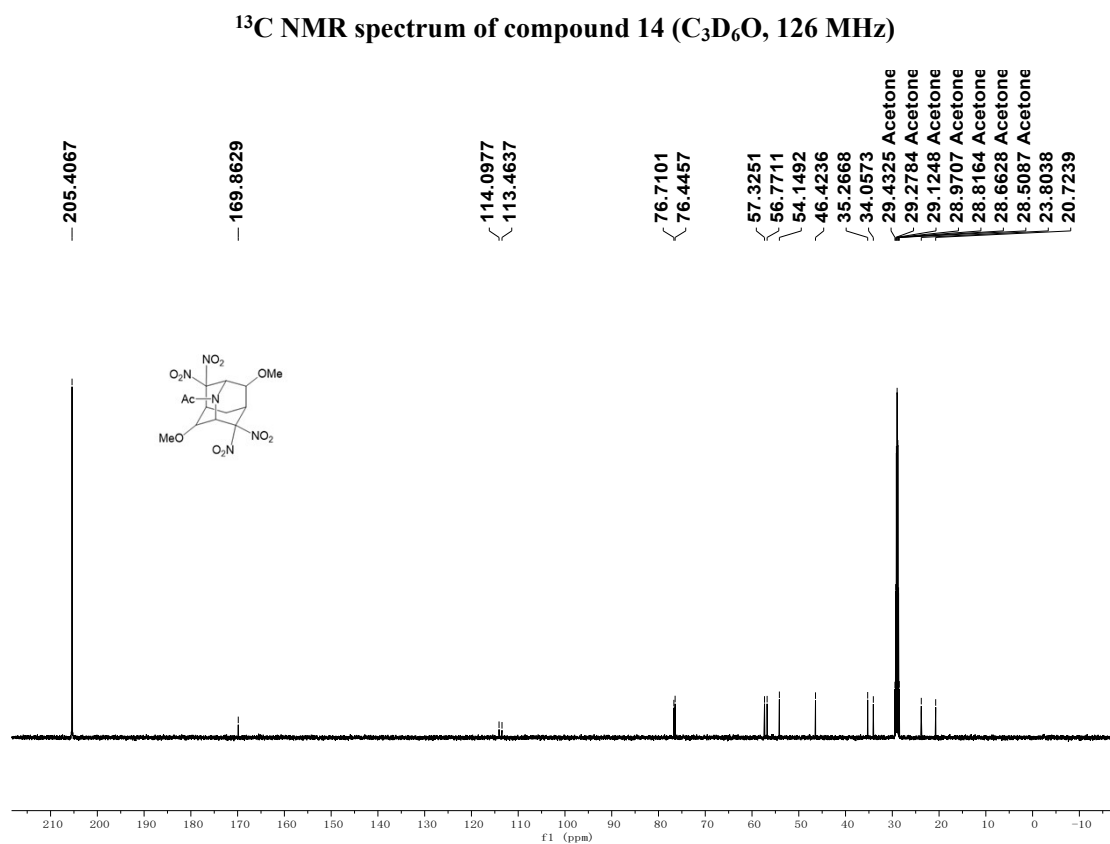

**<sup>1</sup>H NMR spectrum of compound 15 (C<sub>3</sub>D<sub>6</sub>O, 500 MHz)**

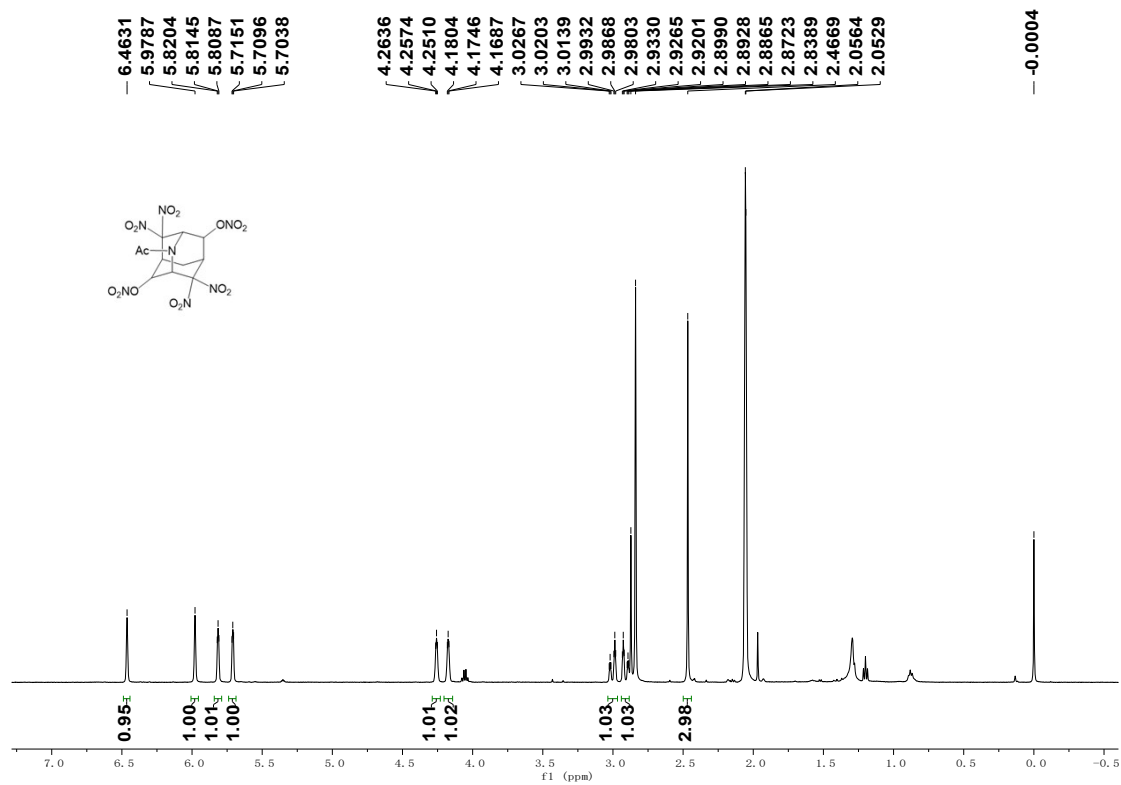

<sup>13</sup>C NMR spectrum of compound 15 (C<sub>3</sub>D<sub>6</sub>O, 126 MHz)

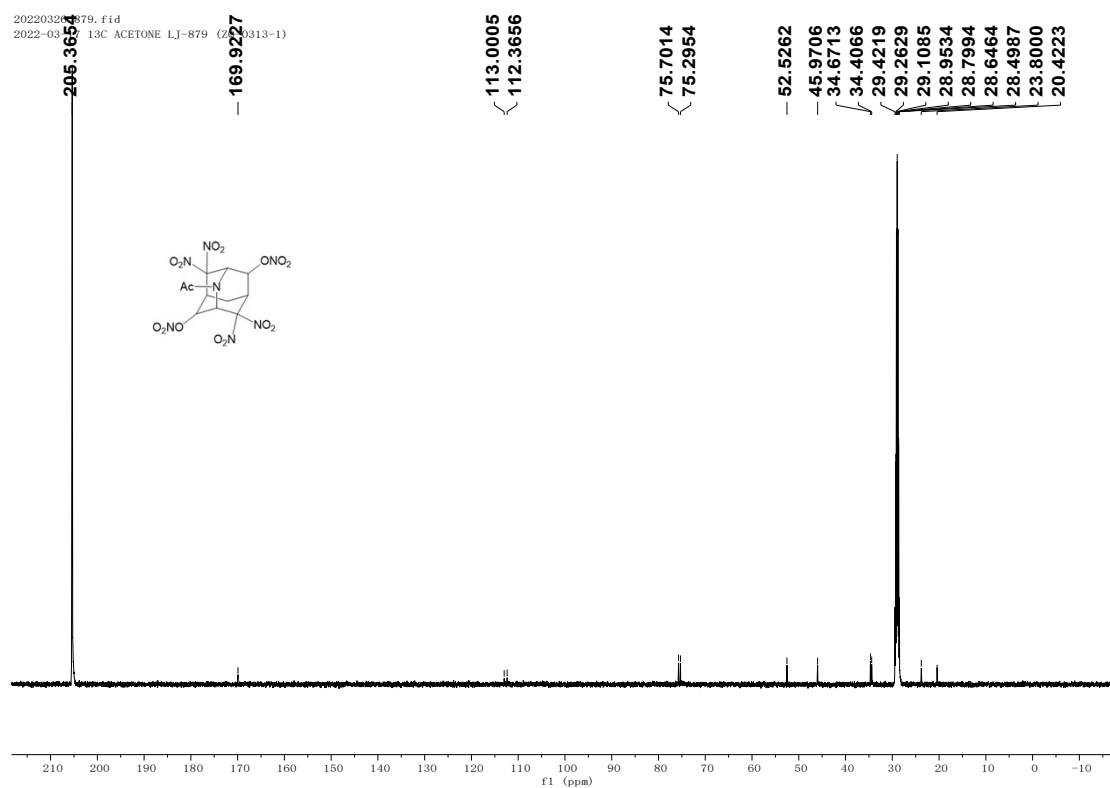

<sup>1</sup>H NMR spectrum of compound 1 (C<sub>3</sub>D<sub>6</sub>O, 500 MHz)



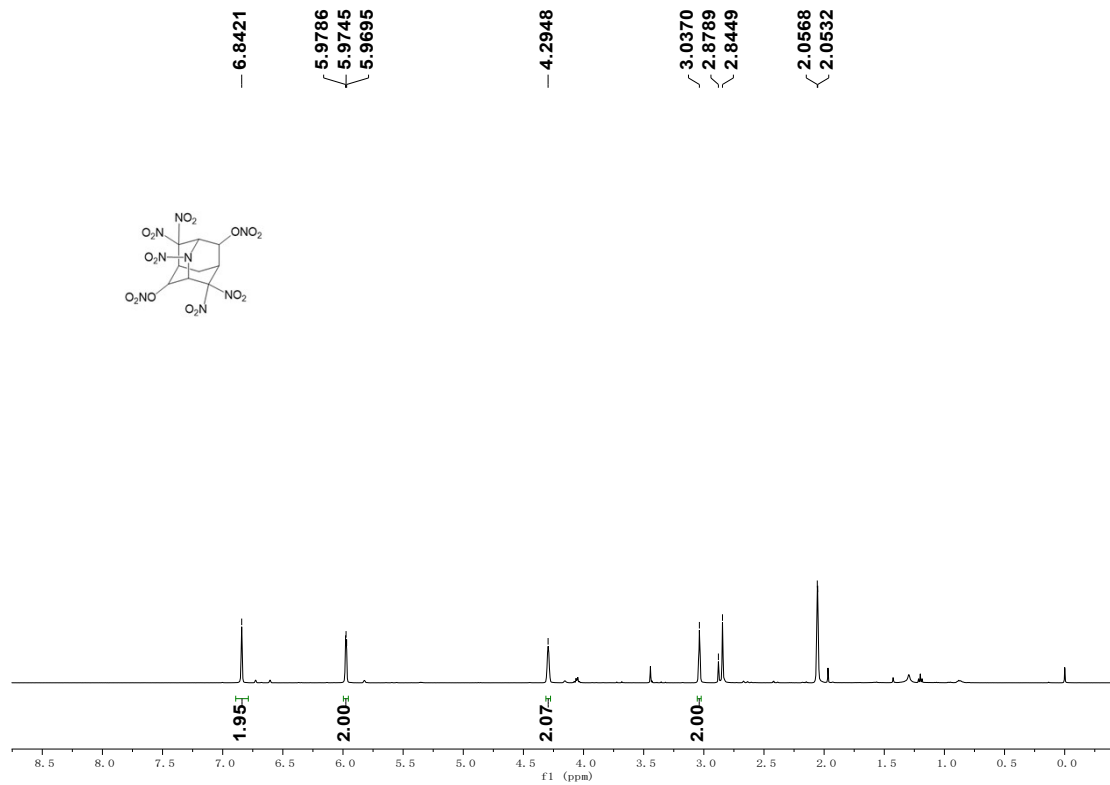

<sup>13</sup>C NMR spectrum of compound 1 (C<sub>3</sub>D<sub>6</sub>O, 126 MHz)

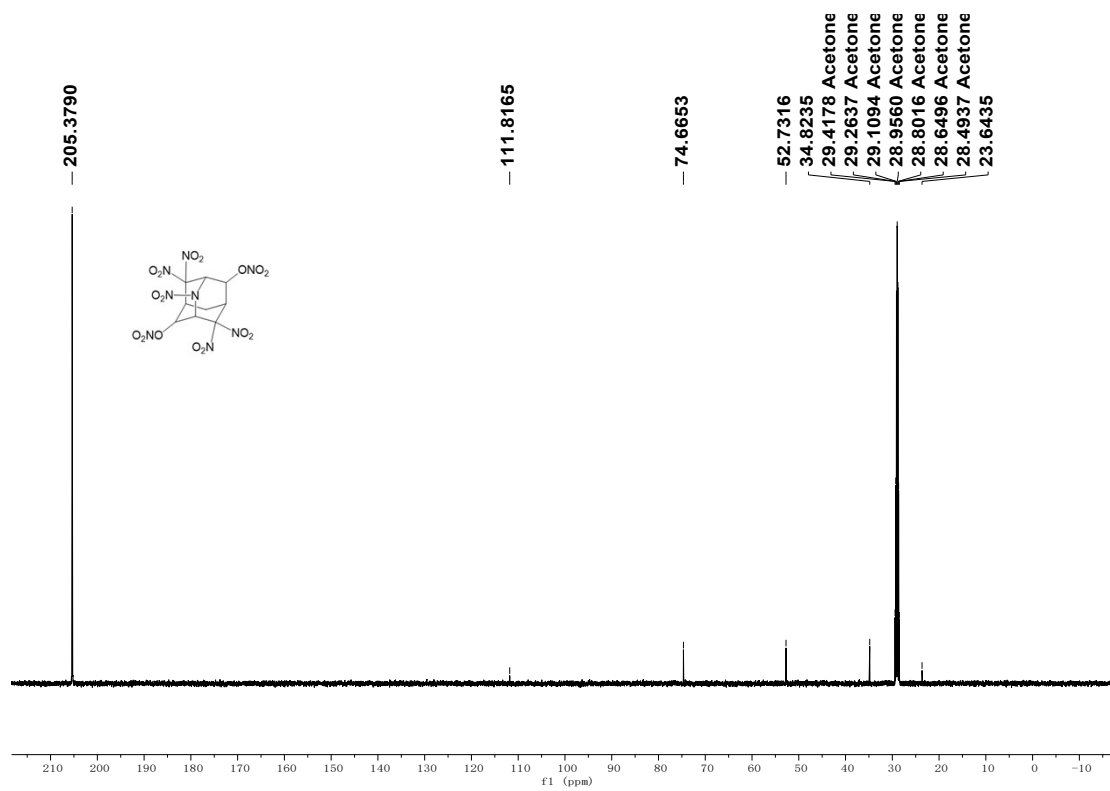

## 4 X-ray Crystal Structures and Data of Compound 10

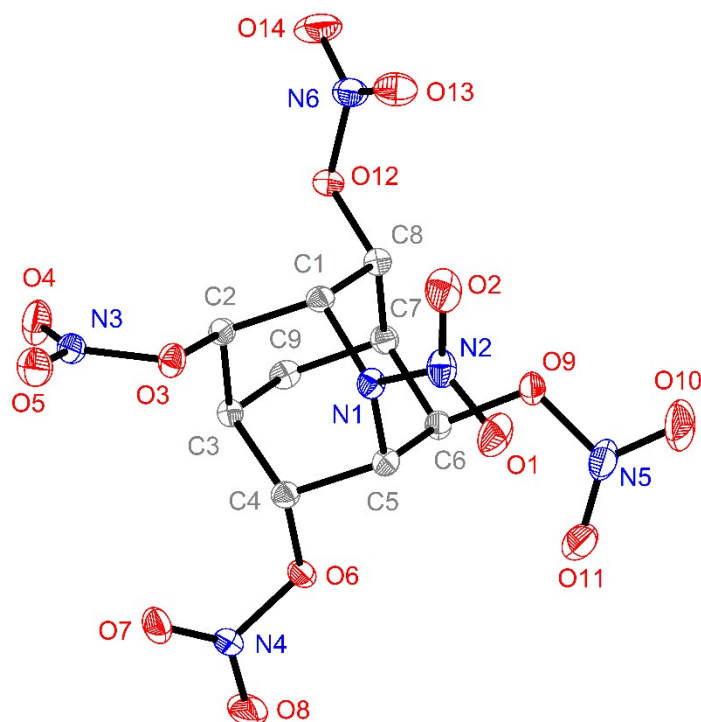

**Figure S1.** ORTEP diagram of **10** Color code: Carbon (grey), Oxygen (red), Nitrogen (blue).

Single crystals of **10** suitable for X-ray diffraction analysis were obtained by slow recrystallization from a mixture of acetone and chloroform. The result of X-ray diffraction indicates that compound **10** crystallizes in the monoclinic space group  $P2_1 2_1 2_1$ . The crystal density was determined to be  $1.776 \text{ g cm}^{-3}$ .

Table S1. Crystal data and structure refinement for **10**.

| Identification code               | <b>10</b>                                                     |          |
|-----------------------------------|---------------------------------------------------------------|----------|
| Empirical formula                 | C <sub>9</sub> H <sub>10</sub> N <sub>6</sub> O <sub>14</sub> |          |
| Formula weight                    | 426.23                                                        |          |
| Temperature                       | 296(2) K                                                      |          |
| Wavelength                        | 0.71073 Å                                                     |          |
| Crystal system                    | Orthorhombic                                                  |          |
| Space group                       | <i>P</i> 21 21 21                                             |          |
| Unit cell dimensions              | a = 8.7329(11) Å                                              | α = 90°. |
|                                   | b = 11.6016(15) Å                                             | β = 90°. |
|                                   | c = 15.738(2) Å                                               | γ = 90°. |
| Volume                            | 1594.5(4) Å <sup>3</sup>                                      |          |
| Z                                 | 4                                                             |          |
| Density (calculated)              | 1.776 mg/m <sup>3</sup>                                       |          |
| Absorption coefficient            | 0.171 mm <sup>-1</sup>                                        |          |
| F(000)                            | 872                                                           |          |
| Crystal size                      | 0.200 x 0.150 x 0.150 mm <sup>3</sup>                         |          |
| Theta range for data collection   | 2.181 to 27.237°.                                             |          |
| Index ranges                      | -10 ≤ h ≤ 11, -14 ≤ k ≤ 14, -18 ≤ l ≤ 19                      |          |
| Reflections collected             | 12487                                                         |          |
| Independent reflections           | 3266 [R(int) = 0.0453]                                        |          |
| Completeness to theta = 25.242°   | 99.9 %                                                        |          |
| Absorption correction             | Semi-empirical from equivalents                               |          |
| Max. and min. transmission        | 0.975 and 0.970                                               |          |
| Refinement method                 | Full-matrix least-squares on F <sup>2</sup>                   |          |
| Data / restraints / parameters    | 3266 / 0 / 262                                                |          |
| Goodness-of-fit on F <sup>2</sup> | 1.032                                                         |          |
| Final R indices [I > 2σ(I)]       | R1 = 0.0367, wR2 = 0.0755                                     |          |
| R indices (all data)              | R1 = 0.0503, wR2 = 0.0817                                     |          |
| Absolute structure parameter      | 0.4(7)                                                        |          |
| Extinction coefficient            | n/a                                                           |          |
| Largest diff. peak and hole       | 0.159 and -0.175 e.Å <sup>-3</sup>                            |          |

Table S2. Atomic coordinates ( $\times 10^4$ ) and equivalent isotropic displacement parameters ( $\text{\AA}^2 \times 10^3$ ) for **10**. U(eq) is defined as one third of the trace of the orthogonalized  $U^{ij}$  tensor.

|       | x        | y       | z       | U(eq) |
|-------|----------|---------|---------|-------|
| C(1)  | 7524(3)  | 5012(2) | 5633(2) | 29(1) |
| C(2)  | 6302(3)  | 4261(2) | 6038(2) | 29(1) |
| C(3)  | 5540(3)  | 4882(2) | 6781(2) | 29(1) |
| C(4)  | 4862(3)  | 6009(2) | 6446(2) | 30(1) |
| C(5)  | 6124(3)  | 6781(2) | 6095(2) | 31(1) |
| C(6)  | 7330(3)  | 7010(2) | 6775(2) | 32(1) |
| C(7)  | 8058(3)  | 5872(2) | 7064(2) | 31(1) |
| C(8)  | 8771(3)  | 5290(2) | 6287(2) | 32(1) |
| C(9)  | 6781(3)  | 5126(2) | 7447(2) | 33(1) |
| N(1)  | 6802(3)  | 6114(2) | 5394(1) | 32(1) |
| N(2)  | 7450(3)  | 6726(2) | 4738(2) | 42(1) |
| N(3)  | 4469(3)  | 2924(2) | 5445(2) | 41(1) |
| N(4)  | 2648(3)  | 6448(2) | 7291(2) | 38(1) |
| N(5)  | 8296(4)  | 8887(2) | 6394(2) | 56(1) |
| N(6)  | 10707(3) | 3842(2) | 6121(2) | 46(1) |
| O(1)  | 7035(3)  | 7720(2) | 4636(2) | 61(1) |
| O(2)  | 8351(3)  | 6214(2) | 4279(1) | 61(1) |
| O(3)  | 5226(2)  | 3997(2) | 5357(1) | 37(1) |
| O(4)  | 4694(3)  | 2377(2) | 6076(2) | 60(1) |
| O(5)  | 3681(3)  | 2718(2) | 4844(2) | 58(1) |
| O(6)  | 4189(2)  | 6697(2) | 7121(1) | 36(1) |
| O(7)  | 2080(2)  | 5644(2) | 6930(2) | 49(1) |
| O(8)  | 2092(3)  | 7089(2) | 7790(2) | 69(1) |
| O(9)  | 8589(2)  | 7690(2) | 6434(1) | 42(1) |
| O(10) | 9397(4)  | 9407(2) | 6161(2) | 99(1) |
| O(11) | 7048(3)  | 9223(2) | 6589(2) | 65(1) |
| O(12) | 9462(2)  | 4241(2) | 6609(1) | 38(1) |
| O(13) | 10958(3) | 4291(2) | 5453(2) | 59(1) |
| O(14) | 11367(3) | 3065(2) | 6463(2) | 68(1) |

Table S3. Bond lengths [ $\text{\AA}$ ] and angles [ $^\circ$ ] for **10**.

|           |          |
|-----------|----------|
| C(1)-N(1) | 1.475(3) |
| C(1)-C(2) | 1.518(4) |
| C(1)-C(8) | 1.533(4) |
| C(1)-H(1) | 0.9800   |

---

|            |          |
|------------|----------|
| C(2)-O(3)  | 1.457(3) |
| C(2)-C(3)  | 1.526(4) |
| C(2)-H(2)  | 0.9800   |
| C(3)-C(4)  | 1.528(4) |
| C(3)-C(9)  | 1.534(4) |
| C(3)-H(3)  | 0.9800   |
| C(4)-O(6)  | 1.453(3) |
| C(4)-C(5)  | 1.524(4) |
| C(4)-H(4)  | 0.9800   |
| C(5)-N(1)  | 1.471(3) |
| C(5)-C(6)  | 1.525(4) |
| C(5)-H(5)  | 0.9800   |
| C(6)-O(9)  | 1.455(3) |
| C(6)-C(7)  | 1.534(4) |
| C(6)-H(6)  | 0.9800   |
| C(7)-C(8)  | 1.529(4) |
| C(7)-C(9)  | 1.535(4) |
| C(7)-H(7)  | 0.9800   |
| C(8)-O(12) | 1.450(3) |
| C(8)-H(8)  | 0.9800   |
| C(9)-H(9A) | 0.9700   |
| C(9)-H(9B) | 0.9700   |
| N(1)-N(2)  | 1.375(3) |
| N(2)-O(1)  | 1.220(3) |
| N(2)-O(2)  | 1.221(3) |
| N(3)-O(5)  | 1.194(3) |
| N(3)-O(4)  | 1.194(3) |
| N(3)-O(3)  | 1.416(3) |
| N(4)-O(8)  | 1.185(3) |
| N(4)-O(7)  | 1.199(3) |
| N(4)-O(6)  | 1.402(3) |
| N(5)-O(10) | 1.193(4) |
| N(5)-O(11) | 1.198(4) |
| N(5)-O(9)  | 1.413(3) |
| N(6)-O(13) | 1.194(3) |
| N(6)-O(14) | 1.197(3) |
| N(6)-O(12) | 1.409(3) |

---

---

|                |            |
|----------------|------------|
| N(1)-C(1)-C(2) | 107.7(2)   |
| N(1)-C(1)-C(8) | 107.0(2)   |
| C(2)-C(1)-C(8) | 109.7(2)   |
| N(1)-C(1)-H(1) | 110.8      |
| C(2)-C(1)-H(1) | 110.8      |
| C(8)-C(1)-H(1) | 110.8      |
| O(3)-C(2)-C(1) | 105.4(2)   |
| O(3)-C(2)-C(3) | 112.4(2)   |
| C(1)-C(2)-C(3) | 110.9(2)   |
| O(3)-C(2)-H(2) | 109.3      |
| C(1)-C(2)-H(2) | 109.3      |
| C(3)-C(2)-H(2) | 109.3      |
| C(2)-C(3)-C(4) | 108.0(2)   |
| C(2)-C(3)-C(9) | 107.6(2)   |
| C(4)-C(3)-C(9) | 110.6(2)   |
| C(2)-C(3)-H(3) | 110.2      |
| C(4)-C(3)-H(3) | 110.2      |
| C(9)-C(3)-H(3) | 110.2      |
| O(6)-C(4)-C(5) | 103.58(19) |
| O(6)-C(4)-C(3) | 112.0(2)   |
| C(5)-C(4)-C(3) | 110.3(2)   |
| O(6)-C(4)-H(4) | 110.2      |
| C(5)-C(4)-H(4) | 110.2      |
| C(3)-C(4)-H(4) | 110.2      |
| N(1)-C(5)-C(4) | 104.7(2)   |
| N(1)-C(5)-C(6) | 109.9(2)   |
| C(4)-C(5)-C(6) | 110.3(2)   |
| N(1)-C(5)-H(5) | 110.6      |
| C(4)-C(5)-H(5) | 110.6      |
| C(6)-C(5)-H(5) | 110.6      |
| O(9)-C(6)-C(5) | 110.9(2)   |
| O(9)-C(6)-C(7) | 105.2(2)   |
| C(5)-C(6)-C(7) | 110.1(2)   |
| O(9)-C(6)-H(6) | 110.2      |
| C(5)-C(6)-H(6) | 110.2      |
| C(7)-C(6)-H(6) | 110.2      |
| C(8)-C(7)-C(6) | 108.2(2)   |
| C(8)-C(7)-C(9) | 111.1(2)   |

---

---

|                  |            |
|------------------|------------|
| C(6)-C(7)-C(9)   | 107.5(2)   |
| C(8)-C(7)-H(7)   | 110.0      |
| C(6)-C(7)-H(7)   | 110.0      |
| C(9)-C(7)-H(7)   | 110.0      |
| O(12)-C(8)-C(7)  | 105.1(2)   |
| O(12)-C(8)-C(1)  | 110.7(2)   |
| C(7)-C(8)-C(1)   | 109.9(2)   |
| O(12)-C(8)-H(8)  | 110.3      |
| C(7)-C(8)-H(8)   | 110.3      |
| C(1)-C(8)-H(8)   | 110.3      |
| C(3)-C(9)-C(7)   | 110.4(2)   |
| C(3)-C(9)-H(9A)  | 109.6      |
| C(7)-C(9)-H(9A)  | 109.6      |
| C(3)-C(9)-H(9B)  | 109.6      |
| C(7)-C(9)-H(9B)  | 109.6      |
| H(9A)-C(9)-H(9B) | 108.1      |
| N(2)-N(1)-C(5)   | 117.2(2)   |
| N(2)-N(1)-C(1)   | 117.6(2)   |
| C(5)-N(1)-C(1)   | 115.88(19) |
| O(1)-N(2)-O(2)   | 125.0(3)   |
| O(1)-N(2)-N(1)   | 117.6(3)   |
| O(2)-N(2)-N(1)   | 117.3(3)   |
| O(5)-N(3)-O(4)   | 130.3(3)   |
| O(5)-N(3)-O(3)   | 111.6(2)   |
| O(4)-N(3)-O(3)   | 118.1(2)   |
| O(8)-N(4)-O(7)   | 129.2(3)   |
| O(8)-N(4)-O(6)   | 112.9(2)   |
| O(7)-N(4)-O(6)   | 117.8(2)   |
| O(10)-N(5)-O(11) | 130.3(3)   |
| O(10)-N(5)-O(9)  | 111.5(3)   |
| O(11)-N(5)-O(9)  | 118.2(3)   |
| O(13)-N(6)-O(14) | 129.4(3)   |
| O(13)-N(6)-O(12) | 118.5(3)   |
| O(14)-N(6)-O(12) | 112.0(3)   |
| N(3)-O(3)-C(2)   | 114.5(2)   |
| N(4)-O(6)-C(4)   | 114.5(2)   |
| N(5)-O(9)-C(6)   | 114.4(2)   |
| N(6)-O(12)-C(8)  | 114.1(2)   |

---

Symmetry transformations used to generate equivalent atoms:

Table S4. Anisotropic displacement parameters ( $\text{\AA}^2 \times 10^3$ ) for **10**. The anisotropic displacement factor exponent takes the form:  $-2\pi^2 [ h^2 a^*2U^{11} + \dots + 2 h k a^* b^* U^{12} ]$

|       | $U^{11}$ | $U^{22}$ | $U^{33}$ | $U^{23}$ | $U^{13}$ | $U^{12}$ |
|-------|----------|----------|----------|----------|----------|----------|
| C(1)  | 29(1)    | 30(1)    | 29(1)    | -4(1)    | 3(1)     | 2(1)     |
| C(2)  | 28(1)    | 28(1)    | 31(1)    | -1(1)    | -4(1)    | 0(1)     |
| C(3)  | 29(1)    | 28(1)    | 31(1)    | 1(1)     | 1(1)     | -2(1)    |
| C(4)  | 30(1)    | 30(1)    | 31(1)    | -3(1)    | 2(1)     | 2(1)     |
| C(5)  | 32(2)    | 28(1)    | 34(1)    | 2(1)     | 0(1)     | 1(1)     |
| C(6)  | 32(2)    | 29(1)    | 35(2)    | -3(1)    | 4(1)     | -3(1)    |
| C(7)  | 29(1)    | 33(1)    | 32(1)    | -2(1)    | -4(1)    | -2(1)    |
| C(8)  | 29(2)    | 29(1)    | 36(2)    | 1(1)     | 1(1)     | 1(1)     |
| C(9)  | 39(2)    | 33(1)    | 28(1)    | 1(1)     | 1(1)     | 4(1)     |
| N(1)  | 38(1)    | 32(1)    | 26(1)    | 5(1)     | 4(1)     | -2(1)    |
| N(2)  | 52(2)    | 44(2)    | 32(1)    | 2(1)     | 5(1)     | -12(1)   |
| N(3)  | 33(1)    | 35(1)    | 56(2)    | -16(1)   | 1(1)     | -4(1)    |
| N(4)  | 26(1)    | 38(1)    | 52(2)    | -3(1)    | 2(1)     | 1(1)     |
| N(5)  | 73(2)    | 34(1)    | 61(2)    | -6(1)    | 19(2)    | -14(2)   |
| N(6)  | 34(1)    | 46(2)    | 57(2)    | -13(1)   | -4(1)    | 6(1)     |
| O(1)  | 86(2)    | 40(1)    | 58(1)    | 19(1)    | 9(1)     | -4(1)    |
| O(2)  | 77(2)    | 61(2)    | 46(1)    | 0(1)     | 28(1)    | -14(1)   |
| O(3)  | 40(1)    | 32(1)    | 38(1)    | -1(1)    | -10(1)   | -6(1)    |
| O(4)  | 67(2)    | 42(1)    | 70(2)    | 14(1)    | -10(1)   | -17(1)   |
| O(5)  | 49(1)    | 56(1)    | 67(2)    | -24(1)   | -12(1)   | -9(1)    |
| O(6)  | 25(1)    | 37(1)    | 45(1)    | -10(1)   | 3(1)     | -3(1)    |
| O(7)  | 36(1)    | 50(1)    | 61(1)    | -9(1)    | 0(1)     | -14(1)   |
| O(8)  | 44(1)    | 67(2)    | 96(2)    | -38(2)   | 24(1)    | 1(1)     |
| O(9)  | 39(1)    | 32(1)    | 54(1)    | -4(1)    | 11(1)    | -9(1)    |
| O(10) | 104(2)   | 55(2)    | 138(3)   | 5(2)     | 57(2)    | -32(2)   |
| O(11) | 74(2)    | 36(1)    | 83(2)    | -4(1)    | 21(2)    | 3(1)     |
| O(12) | 29(1)    | 36(1)    | 50(1)    | 1(1)     | 0(1)     | 6(1)     |
| O(13) | 57(2)    | 67(2)    | 55(2)    | -9(1)    | 13(1)    | 12(1)    |
| O(14) | 55(1)    | 63(2)    | 86(2)    | -4(1)    | -10(1)   | 30(1)    |

Table S5. Hydrogen coordinates ( $\times 10^4$ ) and isotropic displacement parameters ( $\text{\AA}^2 \times 10^3$ ) for **10**.

|      | x    | y    | z    | U(eq) |
|------|------|------|------|-------|
| H(1) | 7965 | 4632 | 5133 | 35    |



|       |      |      |      |    |
|-------|------|------|------|----|
| H(2)  | 6770 | 3545 | 6242 | 35 |
| H(3)  | 4732 | 4399 | 7026 | 35 |
| H(4)  | 4098 | 5849 | 6006 | 36 |
| H(5)  | 5695 | 7507 | 5884 | 37 |
| H(6)  | 6867 | 7407 | 7261 | 38 |
| H(7)  | 8848 | 6023 | 7492 | 38 |
| H(8)  | 9553 | 5789 | 6035 | 38 |
| H(9A) | 7209 | 4404 | 7647 | 40 |
| H(9B) | 6331 | 5522 | 7929 | 40 |

Table S6. Torsion angles [°] for **10**.

|                      |             |
|----------------------|-------------|
| N(1)-C(1)-C(2)-O(3)  | 66.8(2)     |
| C(8)-C(1)-C(2)-O(3)  | -177.0(2)   |
| N(1)-C(1)-C(2)-C(3)  | -55.1(3)    |
| C(8)-C(1)-C(2)-C(3)  | 61.1(3)     |
| O(3)-C(2)-C(3)-C(4)  | -59.9(3)    |
| C(1)-C(2)-C(3)-C(4)  | 57.8(3)     |
| O(3)-C(2)-C(3)-C(9)  | -179.3(2)   |
| C(1)-C(2)-C(3)-C(9)  | -61.6(3)    |
| C(2)-C(3)-C(4)-O(6)  | -176.5(2)   |
| C(9)-C(3)-C(4)-O(6)  | -59.0(3)    |
| C(2)-C(3)-C(4)-C(5)  | -61.7(3)    |
| C(9)-C(3)-C(4)-C(5)  | 55.8(3)     |
| O(6)-C(4)-C(5)-N(1)  | -178.62(19) |
| C(3)-C(4)-C(5)-N(1)  | 61.3(2)     |
| O(6)-C(4)-C(5)-C(6)  | 63.2(3)     |
| C(3)-C(4)-C(5)-C(6)  | -56.9(3)    |
| N(1)-C(5)-C(6)-O(9)  | 61.7(3)     |
| C(4)-C(5)-C(6)-O(9)  | 176.6(2)    |
| N(1)-C(5)-C(6)-C(7)  | -54.4(3)    |
| C(4)-C(5)-C(6)-C(7)  | 60.6(3)     |
| O(9)-C(6)-C(7)-C(8)  | -61.0(3)    |
| C(5)-C(6)-C(7)-C(8)  | 58.6(3)     |
| O(9)-C(6)-C(7)-C(9)  | 178.9(2)    |
| C(5)-C(6)-C(7)-C(9)  | -61.5(3)    |
| C(6)-C(7)-C(8)-O(12) | 178.73(19)  |
| C(9)-C(7)-C(8)-O(12) | -63.5(3)    |
| C(6)-C(7)-C(8)-C(1)  | -62.0(3)    |

---

|                       |           |
|-----------------------|-----------|
| C(9)-C(7)-C(8)-C(1)   | 55.7(3)   |
| N(1)-C(1)-C(8)-O(12)  | 175.5(2)  |
| C(2)-C(1)-C(8)-O(12)  | 58.9(3)   |
| N(1)-C(1)-C(8)-C(7)   | 59.7(3)   |
| C(2)-C(1)-C(8)-C(7)   | -56.9(3)  |
| C(2)-C(3)-C(9)-C(7)   | 59.2(3)   |
| C(4)-C(3)-C(9)-C(7)   | -58.5(3)  |
| C(8)-C(7)-C(9)-C(3)   | -57.8(3)  |
| C(6)-C(7)-C(9)-C(3)   | 60.4(3)   |
| C(4)-C(5)-N(1)-N(2)   | 151.8(2)  |
| C(6)-C(5)-N(1)-N(2)   | -89.8(3)  |
| C(4)-C(5)-N(1)-C(1)   | -62.3(3)  |
| C(6)-C(5)-N(1)-C(1)   | 56.1(3)   |
| C(2)-C(1)-N(1)-N(2)   | -154.2(2) |
| C(8)-C(1)-N(1)-N(2)   | 87.8(3)   |
| C(2)-C(1)-N(1)-C(5)   | 60.0(3)   |
| C(8)-C(1)-N(1)-C(5)   | -58.0(3)  |
| C(5)-N(1)-N(2)-O(1)   | -22.0(4)  |
| C(1)-N(1)-N(2)-O(1)   | -167.3(3) |
| C(5)-N(1)-N(2)-O(2)   | 161.1(2)  |
| C(1)-N(1)-N(2)-O(2)   | 15.7(4)   |
| O(5)-N(3)-O(3)-C(2)   | -175.4(2) |
| O(4)-N(3)-O(3)-C(2)   | 4.6(3)    |
| C(1)-C(2)-O(3)-N(3)   | 150.5(2)  |
| C(3)-C(2)-O(3)-N(3)   | -88.6(2)  |
| O(8)-N(4)-O(6)-C(4)   | -173.7(2) |
| O(7)-N(4)-O(6)-C(4)   | 6.4(3)    |
| C(5)-C(4)-O(6)-N(4)   | 152.8(2)  |
| C(3)-C(4)-O(6)-N(4)   | -88.3(3)  |
| O(10)-N(5)-O(9)-C(6)  | 175.6(3)  |
| O(11)-N(5)-O(9)-C(6)  | -4.2(4)   |
| C(5)-C(6)-O(9)-N(5)   | 81.0(3)   |
| C(7)-C(6)-O(9)-N(5)   | -159.9(2) |
| O(13)-N(6)-O(12)-C(8) | -9.2(3)   |
| O(14)-N(6)-O(12)-C(8) | 171.0(2)  |
| C(7)-C(8)-O(12)-N(6)  | -153.4(2) |
| C(1)-C(8)-O(12)-N(6)  | 87.9(2)   |

---

Symmetry transformations used to generate equivalent atoms:

## 5 X-ray Crystal Structures and Data of Compound 1

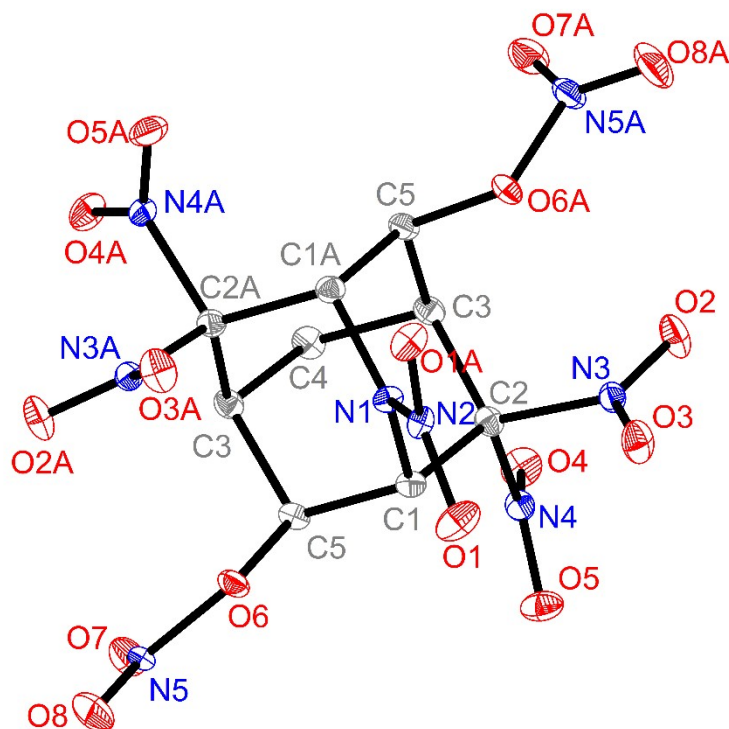

**Figure S2.** ORTEP diagram of **1** Color code: Carbon (grey), Oxygen (red), Nitrogen (blue).

Single crystals of **1** were obtained by slow recrystallization from a mixture of ethanol and chloroform. The result of X-ray diffraction indicates that compound **1** crystallizes in the monoclinic space group  $C2/c$ . The crystal density was determined to be  $1.878 \text{ g cm}^{-3}$ .

Table S7. Crystal data and structure refinement for **1**.

| Identification code               | <b>1</b>                                                     |                 |
|-----------------------------------|--------------------------------------------------------------|-----------------|
| Empirical formula                 | C <sub>9</sub> H <sub>8</sub> N <sub>8</sub> O <sub>16</sub> |                 |
| Formula weight                    | 484.23                                                       |                 |
| Temperature                       | 296(2) K                                                     |                 |
| Wavelength                        | 0.71073 Å                                                    |                 |
| Crystal system                    | Monoclinic                                                   |                 |
| Space group                       | <i>C</i> 2/ <i>c</i>                                         |                 |
| Unit cell dimensions              | a = 10.1396(16) Å                                            | α = 90°.        |
|                                   | b = 11.8452(18) Å                                            | β = 99.443(2)°. |
|                                   | c = 14.454(2) Å                                              | γ = 90°.        |
| Volume                            | 1712.5(5) Å <sup>3</sup>                                     |                 |
| Z                                 | 4                                                            |                 |
| Density (calculated)              | 1.878 mg/m <sup>3</sup>                                      |                 |
| Absorption coefficient            | 0.183 mm <sup>-1</sup>                                       |                 |
| F(000)                            | 984                                                          |                 |
| Crystal size                      | 0.140 x 0.140 x 0.140 mm <sup>3</sup>                        |                 |
| Theta range for data collection   | 2.665 to 27.226°.                                            |                 |
| Index ranges                      | -12 ≤ h ≤ 12, -14 ≤ k ≤ 14, -18 ≤ l ≤ 17                     |                 |
| Reflections collected             | 6550                                                         |                 |
| Independent reflections           | 1773 [R(int) = 0.0193]                                       |                 |
| Completeness to theta = 25.242°   | 99.9 %                                                       |                 |
| Absorption correction             | Semi-empirical from equivalents                              |                 |
| Max. and min. transmission        | 0.975 and 0.975                                              |                 |
| Refinement method                 | Full-matrix least-squares on F <sup>2</sup>                  |                 |
| Data / restraints / parameters    | 1773 / 0 / 151                                               |                 |
| Goodness-of-fit on F <sup>2</sup> | 1.045                                                        |                 |
| Final R indices [I > 2σ(I)]       | R1 = 0.0392, wR2 = 0.1114                                    |                 |
| R indices (all data)              | R1 = 0.0472, wR2 = 0.1173                                    |                 |
| Extinction coefficient            | n/a                                                          |                 |
| Largest diff. peak and hole       | 0.285 and -0.283 e.Å <sup>-3</sup>                           |                 |

Table S8. Atomic coordinates ( $\times 10^4$ ) and equivalent isotropic displacement parameters ( $\text{\AA}^2 \times 10^3$ ) for **1**.  $U(\text{eq})$  is defined as one third of the trace of the orthogonalized  $U^{ij}$  tensor.

|      | x       | y       | z       | $U(\text{eq})$ |
|------|---------|---------|---------|----------------|
| C(1) | 5007(2) | 3094(1) | 6637(1) | 26(1)          |
| C(2) | 6272(2) | 3826(1) | 6798(1) | 26(1)          |
| C(3) | 6278(2) | 4590(1) | 7646(1) | 27(1)          |
| C(4) | 5000    | 5327(2) | 7500    | 31(1)          |
| C(5) | 3781(2) | 3871(1) | 6474(1) | 28(1)          |
| N(1) | 5000    | 2464(2) | 7500    | 28(1)          |
| N(2) | 5000    | 1294(2) | 7500    | 40(1)          |
| N(3) | 7542(1) | 3096(1) | 6873(1) | 34(1)          |
| N(4) | 6379(1) | 4511(1) | 5911(1) | 35(1)          |
| N(5) | 1481(2) | 3644(2) | 5739(1) | 48(1)          |
| O(1) | 4870(2) | 835(1)  | 6733(1) | 60(1)          |
| O(2) | 8583(1) | 3585(1) | 7110(1) | 59(1)          |
| O(3) | 7410(2) | 2109(1) | 6678(1) | 55(1)          |
| O(4) | 6765(2) | 5473(1) | 5998(1) | 53(1)          |
| O(5) | 6071(2) | 4011(1) | 5173(1) | 54(1)          |
| O(6) | 2676(1) | 3108(1) | 6243(1) | 38(1)          |
| O(7) | 1544(2) | 4631(2) | 5570(1) | 66(1)          |
| O(8) | 591(2)  | 2996(2) | 5565(1) | 81(1)          |

Table S9. Bond lengths [ $\text{\AA}$ ] and angles [ $^\circ$ ] for **1**.

|             |            |
|-------------|------------|
| C(1)-N(1)   | 1.4544(17) |
| C(1)-C(5)   | 1.533(2)   |
| C(1)-C(2)   | 1.534(2)   |
| C(1)-H(1)   | 0.9800     |
| C(2)-C(3)   | 1.523(2)   |
| C(2)-N(4)   | 1.536(2)   |
| C(2)-N(3)   | 1.541(2)   |
| C(3)-C(5)#1 | 1.540(2)   |
| C(3)-C(4)   | 1.547(2)   |
| C(3)-H(3)   | 0.9800     |
| C(4)-H(4A)  | 0.9700     |
| C(4)-H(4B)  | 0.9700     |
| C(5)-O(6)   | 1.4350(19) |
| C(5)-H(5)   | 0.9800     |
| N(1)-N(2)   | 1.387(3)   |

---

|                   |            |
|-------------------|------------|
| N(2)-O(1)#1       | 1.2216(17) |
| N(2)-O(1)         | 1.2217(17) |
| N(3)-O(2)         | 1.204(2)   |
| N(3)-O(3)         | 1.204(2)   |
| N(4)-O(4)         | 1.205(2)   |
| N(4)-O(5)         | 1.215(2)   |
| N(5)-O(8)         | 1.180(2)   |
| N(5)-O(7)         | 1.198(3)   |
| N(5)-O(6)         | 1.454(2)   |
|                   |            |
| N(1)-C(1)-C(5)    | 108.75(12) |
| N(1)-C(1)-C(2)    | 106.36(11) |
| C(5)-C(1)-C(2)    | 108.72(13) |
| N(1)-C(1)-H(1)    | 111.0      |
| C(5)-C(1)-H(1)    | 111.0      |
| C(2)-C(1)-H(1)    | 111.0      |
| C(3)-C(2)-C(1)    | 110.52(13) |
| C(3)-C(2)-N(4)    | 111.54(13) |
| C(1)-C(2)-N(4)    | 110.13(12) |
| C(3)-C(2)-N(3)    | 112.61(12) |
| C(1)-C(2)-N(3)    | 111.18(13) |
| N(4)-C(2)-N(3)    | 100.49(12) |
| C(2)-C(3)-C(5)#1  | 109.91(13) |
| C(2)-C(3)-C(4)    | 109.42(11) |
| C(5)#1-C(3)-C(4)  | 106.27(12) |
| C(2)-C(3)-H(3)    | 110.4      |
| C(5)#1-C(3)-H(3)  | 110.4      |
| C(4)-C(3)-H(3)    | 110.4      |
| C(3)#1-C(4)-C(3)  | 111.34(18) |
| C(3)#1-C(4)-H(4A) | 109.4      |
| C(3)-C(4)-H(4A)   | 109.4      |
| C(3)#1-C(4)-H(4B) | 109.4      |
| C(3)-C(4)-H(4B)   | 109.4      |
| H(4A)-C(4)-H(4B)  | 108.0      |
| O(6)-C(5)-C(1)    | 103.91(12) |
| O(6)-C(5)-C(3)#1  | 113.97(13) |
| C(1)-C(5)-C(3)#1  | 110.18(12) |
| O(6)-C(5)-H(5)    | 109.5      |

---

|                  |            |
|------------------|------------|
| C(1)-C(5)-H(5)   | 109.5      |
| C(3)#1-C(5)-H(5) | 109.5      |
| N(2)-N(1)-C(1)   | 120.86(8)  |
| N(2)-N(1)-C(1)#1 | 120.86(8)  |
| C(1)-N(1)-C(1)#1 | 118.28(17) |
| O(1)#1-N(2)-O(1) | 127.2(2)   |
| O(1)#1-N(2)-N(1) | 116.42(11) |
| O(1)-N(2)-N(1)   | 116.41(11) |
| O(2)-N(3)-O(3)   | 126.29(16) |
| O(2)-N(3)-C(2)   | 115.69(15) |
| O(3)-N(3)-C(2)   | 118.00(14) |
| O(4)-N(4)-O(5)   | 125.81(16) |
| O(4)-N(4)-C(2)   | 118.59(15) |
| O(5)-N(4)-C(2)   | 115.60(14) |
| O(8)-N(5)-O(7)   | 131.0(2)   |
| O(8)-N(5)-O(6)   | 111.6(2)   |
| O(7)-N(5)-O(6)   | 117.44(16) |
| C(5)-O(6)-N(5)   | 113.34(13) |

Symmetry transformations used to generate equivalent atoms:

#1 -x+1,y,-z+3/2

Table S10. Anisotropic displacement parameters ( $\text{\AA}^2 \times 10^3$ ) for **1**. The anisotropic displacement factor exponent takes the form:  $-2\pi^2 [ h^2 a^{*2}U^{11} + \dots + 2 h k a^* b^* U^{12} ]$

|      | $U^{11}$ | $U^{22}$ | $U^{33}$ | $U^{23}$ | $U^{13}$ | $U^{12}$ |
|------|----------|----------|----------|----------|----------|----------|
| C(1) | 28(1)    | 26(1)    | 23(1)    | -1(1)    | 2(1)     | -2(1)    |
| C(2) | 26(1)    | 25(1)    | 27(1)    | 5(1)     | 2(1)     | 2(1)     |
| C(3) | 26(1)    | 24(1)    | 30(1)    | -1(1)    | 0(1)     | -3(1)    |
| C(4) | 33(1)    | 22(1)    | 37(1)    | 0        | 2(1)     | 0        |
| C(5) | 26(1)    | 30(1)    | 25(1)    | 0(1)     | -2(1)    | -1(1)    |
| N(1) | 38(1)    | 19(1)    | 26(1)    | 0        | 5(1)     | 0        |
| N(2) | 49(1)    | 23(1)    | 52(1)    | 0        | 20(1)    | 0        |
| N(3) | 29(1)    | 38(1)    | 35(1)    | 4(1)     | 6(1)     | 5(1)     |
| N(4) | 33(1)    | 39(1)    | 34(1)    | 10(1)    | 7(1)     | -1(1)    |
| N(5) | 31(1)    | 72(1)    | 38(1)    | -10(1)   | -5(1)    | 1(1)     |
| O(1) | 94(1)    | 31(1)    | 60(1)    | -17(1)   | 29(1)    | -12(1)   |
| O(2) | 26(1)    | 61(1)    | 86(1)    | -2(1)    | 4(1)     | -2(1)    |
| O(3) | 46(1)    | 36(1)    | 82(1)    | -6(1)    | 11(1)    | 11(1)    |
| O(4) | 68(1)    | 37(1)    | 55(1)    | 12(1)    | 18(1)    | -9(1)    |

|      |       |        |       |        |        |        |
|------|-------|--------|-------|--------|--------|--------|
| O(5) | 70(1) | 61(1)  | 30(1) | 5(1)   | 7(1)   | -13(1) |
| O(6) | 28(1) | 42(1)  | 38(1) | -7(1)  | -6(1)  | -6(1)  |
| O(7) | 48(1) | 82(1)  | 62(1) | 8(1)   | -4(1)  | 16(1)  |
| O(8) | 40(1) | 109(2) | 86(1) | -25(1) | -12(1) | -17(1) |

Table S11. Hydrogen coordinates ( $\times 10^4$ ) and isotropic displacement parameters ( $\text{\AA}^2 \times 10^{-3}$ ) for **1**.

|       | x    | y    | z    | U(eq) |
|-------|------|------|------|-------|
| H(1)  | 5011 | 2583 | 6105 | 31    |
| H(3)  | 7077 | 5068 | 7740 | 33    |
| H(4A) | 5001 | 5808 | 8043 | 37    |
| H(4B) | 4999 | 5808 | 6957 | 37    |
| H(5)  | 3832 | 4367 | 5939 | 33    |

Table S12. Torsion angles [ $^\circ$ ] for **1**.

|                         |             |
|-------------------------|-------------|
| N(1)-C(1)-C(2)-C(3)     | -57.36(15)  |
| C(5)-C(1)-C(2)-C(3)     | 59.59(15)   |
| N(1)-C(1)-C(2)-N(4)     | 178.94(12)  |
| C(5)-C(1)-C(2)-N(4)     | -64.10(16)  |
| N(1)-C(1)-C(2)-N(3)     | 68.45(15)   |
| C(5)-C(1)-C(2)-N(3)     | -174.59(12) |
| C(1)-C(2)-C(3)-C(5)#1   | 59.15(15)   |
| N(4)-C(2)-C(3)-C(5)#1   | -177.98(12) |
| N(3)-C(2)-C(3)-C(5)#1   | -65.86(16)  |
| C(1)-C(2)-C(3)-C(4)     | -57.18(16)  |
| N(4)-C(2)-C(3)-C(4)     | 65.69(16)   |
| N(3)-C(2)-C(3)-C(4)     | 177.81(12)  |
| C(2)-C(3)-C(4)-C(3)#1   | 58.54(10)   |
| C(5)#1-C(3)-C(4)-C(3)#1 | -60.08(9)   |
| N(1)-C(1)-C(5)-O(6)     | -70.01(14)  |
| C(2)-C(1)-C(5)-O(6)     | 174.58(12)  |
| N(1)-C(1)-C(5)-C(3)#1   | 52.46(16)   |
| C(2)-C(1)-C(5)-C(3)#1   | -62.94(16)  |
| C(5)-C(1)-N(1)-N(2)     | 122.34(9)   |
| C(2)-C(1)-N(1)-N(2)     | -120.74(9)  |
| C(5)-C(1)-N(1)-C(1)#1   | -57.66(9)   |
| C(2)-C(1)-N(1)-C(1)#1   | 59.27(9)    |
| C(1)-N(1)-N(2)-O(1)#1   | 172.88(12)  |



---

|                         |             |
|-------------------------|-------------|
| C(1)#1-N(1)-N(2)-O(1)#1 | -7.12(12)   |
| C(1)-N(1)-N(2)-O(1)     | -7.12(12)   |
| C(1)#1-N(1)-N(2)-O(1)   | 172.88(12)  |
| C(3)-C(2)-N(3)-O(2)     | -46.8(2)    |
| C(1)-C(2)-N(3)-O(2)     | -171.47(15) |
| N(4)-C(2)-N(3)-O(2)     | 71.98(18)   |
| C(3)-C(2)-N(3)-O(3)     | 134.30(16)  |
| C(1)-C(2)-N(3)-O(3)     | 9.7(2)      |
| N(4)-C(2)-N(3)-O(3)     | -106.90(16) |
| C(3)-C(2)-N(4)-O(4)     | 17.3(2)     |
| C(1)-C(2)-N(4)-O(4)     | 140.35(16)  |
| N(3)-C(2)-N(4)-O(4)     | -102.31(17) |
| C(3)-C(2)-N(4)-O(5)     | -163.38(14) |
| C(1)-C(2)-N(4)-O(5)     | -40.29(19)  |
| N(3)-C(2)-N(4)-O(5)     | 77.05(17)   |
| C(1)-C(5)-O(6)-N(5)     | -159.04(13) |
| C(3)#1-C(5)-O(6)-N(5)   | 81.02(16)   |
| O(8)-N(5)-O(6)-C(5)     | -179.63(17) |
| O(7)-N(5)-O(6)-C(5)     | 0.5(2)      |

---

Symmetry transformations used to generate equivalent atoms:

#1 -x+1,y,-z+3/2

## 6 Computational Method

For the explosives with CHNO elements, these parameters can be calculated using the Kamlet-Jacobos (K-J) equations:

$$D = (1.011 + 1.312\rho_0) (N \bar{M}^{0.5} Q^{0.5})^{0.5} \quad (1)$$

$$P = 1.558\rho_0^2 N \bar{M}^{0.5} Q^{0.5} \quad (2)$$

here  $P$  is the detonation pressure (GPa),  $D$  is the detonation velocity (km/s),  $\rho_0$  is the packed density ( $\text{g}\cdot\text{cm}^{-3}$ ),  $N$  is the moles of gas produced by per gram of explosives,  $\bar{M}$  is an average molar weight of detonation products, and  $Q$  is the chemical energy of detonation ( $\text{cal}\cdot\text{g}^{-1}$ ).

In the molecular design of HEDC, we suggested that  $Q$  can be calculated as the difference between the heats of formation (HOFs) of products and that of reactants. From the K-J equations, it is found that  $Q$  has much less effect than  $\rho_0$  on  $D$  and  $P$ . In order to save the required time and resources,  $Q$  and HOF estimated using the semi-empirical MO PM3 method are precise enough to substitute the experimental data as has been proven in the previous studies<sup>8-10</sup>.

$\rho_0$  is crucial to the detonation properties. Based on the quantum chemistry, we recommend an

efficient and convenient way to predict the theoretical molecular density  $\rho_0$  replaced by  $\rho_{\text{cry}}$ <sup>11,12</sup>. Studies have indicated that, when the average molar volume  $V$  estimated by Monte-Carlo method based on 0.001electrons/bohr<sup>3</sup> density space at the B3LYP/6-31G\*\* or 6-31G\* level is used, the theoretical molecular density  $\rho_0$  ( $\rho_0 = M/V$ ,  $M$  is the molecular weight) is close to the experimental crystal density  $\rho_{\text{cry}}$ .

## Calculated Results

Table S13. Physicochemical properties and detonation performances of **1** and **10**.

| Compound  | Formula                                                       | $\rho^a$<br>(g·cm <sup>-3</sup> ) | $\Delta H_f^b$<br>(kJ·mol <sup>-1</sup> ) | $D^c$<br>(m·s <sup>-1</sup> ) | $Q^d$<br>(cal·g <sup>-1</sup> ) | $P^e$<br>(GPa) | $N^f$<br>(mol·g <sup>-1</sup> ) | $\overline{M}^g$<br>(g·mol <sup>-1</sup> ) |
|-----------|---------------------------------------------------------------|-----------------------------------|-------------------------------------------|-------------------------------|---------------------------------|----------------|---------------------------------|--------------------------------------------|
| <b>1</b>  | C <sub>9</sub> H <sub>8</sub> N <sub>8</sub> O <sub>16</sub>  | 1.878                             | -49.11                                    | 8914                          | 1618.66                         | 36.16          | 0.029                           | 32.00                                      |
| <b>10</b> | C <sub>9</sub> H <sub>10</sub> N <sub>6</sub> O <sub>14</sub> | 1.776                             | -304.48                                   | 8317                          | 1500.32                         | 30.45          | 0.029                           | 29.76                                      |

<sup>a</sup> crystal density determined from single-crystal X-ray diffraction analysis. <sup>b</sup> Heat of formation. <sup>c</sup> Theoretical detonation velocity. <sup>d</sup> Heat of detonation. <sup>e</sup> Theoretical detonation pressure. <sup>f</sup> Moles of gas produced by per gram of explosives. <sup>g</sup> Average molar weight of detonation products.

## 7 References

- 1 J. Zhang, Y. F. Ling, G. X. Wang, L. Zhang and J. Luo, Synthesis of two new gem-fluoronitro containing tetranitroadamantanes and property comparison with their nitro and gem-dinitro analogues, *Org Biomol Chem*, 2018, 16, 4784-4788.
- 2 G. Mislin and M. Miesch, Synthesis of Polyfunctionalized Bicyclo[5.3.1]undecadiene Ring Systems Using a Two-Carbon Ring-Expansion of Cyclobutene Intermediates, *European Journal of Organic Chemistry*, 2001, 2001, 1753-1759.
- 3 B. Graetz, S. Rychnovsky, W.-H. Leu, P. Farmer and R. Lin, C<sub>2</sub>-Symmetric nitroxides and their potential as enantioselective oxidants, *Tetrahedron: Asymmetry*, 2005, 16, 3584-3598.
- 4 K. Wärnmark, C. Wallentin, E. Orentas and E. Butkus, Baker's Yeast for Sweet Dough Enables Large-Scale Synthesis of Enantiomerically Pure Bicyclo[3.3.1]nonane-2,6-dione, *Synthesis*, 2009, 2009, 864-867.
- 5 Q. Shi, T. Javorskis, K.-E. Bergquist, A. Ulčinas, G. Niaura, I. Matulaitienė, E. Orentas and K. Wärnmark, Stimuli-controlled self-assembly of diverse tubular aggregates from one single small monomer, *Nature Communications*, 2017, 8, 1-9..
- 6 C.-J. Wallentin, E. Orentas, M. T. Johnson, N. B. Báthori, E. Butkus, O. F. Wendt, K. Wärnmark and L. Öhrström, Synthetic and crystallographic studies of bicyclo[3.3.1]nonane derivatives: from strong to weak hydrogen bonds and the stereochemistry of network formation, *CrystEngComm*, 2012, 14, 178-187.
- 7 R. Rimkus, M. Jurgelėnas and S. Stončius, 4,8-Disubstituted Bicyclo[3.3.1]nona-2,6-dienes as

- Chiral Ligands for Rh-Catalyzed Asymmetric 1,4-Addition Reactions, *European Journal of Organic Chemistry*, 2015, 2015, 3017-3021.
- 8 G. Wang, X. Gong, H. Du, Y. Liu, H. Xiao, Theoretical Prediction of Properties of Aliphatic Polynitrates, *The Journal of Physical Chemistry A*, 2011, 115, 795-804.
- 9 G. Wang, X. Gong, Y. Liu, H. Du, X. Xu, H. Xiao, Looking for high energy density compounds applicable for propellant among the derivatives of dpo with -n3, -ono2, and -nno2 groups, *Journal of Computational Chemistry*, 2011, 32, 943-952.
- 10 Y. Xu, G. Wang, Y. Liu, X. Gong, Theoretical investigations on the density, detonation performance and stability of fluorinated hexanitroadamantanes, *Structural Chemistry*, 2021, 32, 1651-1657.
- 11 L. Qiu, H. Xiao, X. Gong, X. Ju, W. Zhu, Crystal density predictions for nitramines based on quantum chemistry, *Journal of Hazardous Materials*, 2007, 141, 280-288.
- 12 G. Wang, X. Gong, Y. Liu, H. Du, H. Xiao, Prediction of crystalline densities of polynitro arenes for estimation of their detonation performance based on quantum chemistry, *Journal of Molecular Structure: THEOCHEM*, 2010, 953, 163-169.
